# Supplementary material
Source: publisher figshare collection journal article supplement (https://acs.figshare.com/ndownloader/files/4173217)
Supplement: Supplementary file 1 [file 4173217]

 
data_bj233
 
_audit_creation_method            SHELXL-97
_chemical_name_systematic
;
 ?
;
_chemical_name_common             ?
_chemical_melting_point           ?
_chemical_formula_moiety          ?
_chemical_formula_sum
 'C42 H45 Cl2 N O P2 Ru S'
_chemical_formula_weight          845.76
 
loop_
 _atom_type_symbol
 _atom_type_description
 _atom_type_scat_dispersion_real
 _atom_type_scat_dispersion_imag
 _atom_type_scat_source
 'C'  'C'   0.0033   0.0016
 'International Tables Vol C Tables 4.2.6.8 and 6.1.1.4'
 'H'  'H'   0.0000   0.0000
 'International Tables Vol C Tables 4.2.6.8 and 6.1.1.4'
 'N'  'N'   0.0061   0.0033
 'International Tables Vol C Tables 4.2.6.8 and 6.1.1.4'
 'O'  'O'   0.0106   0.0060
 'International Tables Vol C Tables 4.2.6.8 and 6.1.1.4'
 'P'  'P'   0.1023   0.0942
 'International Tables Vol C Tables 4.2.6.8 and 6.1.1.4'
 'S'  'S'   0.1246   0.1234
 'International Tables Vol C Tables 4.2.6.8 and 6.1.1.4'
 'Cl'  'Cl'   0.1484   0.1585
 'International Tables Vol C Tables 4.2.6.8 and 6.1.1.4'
 'Ru'  'Ru'  -1.2594   0.8363
 'International Tables Vol C Tables 4.2.6.8 and 6.1.1.4'
 
_symmetry_cell_setting            monoclinic
_symmetry_space_group_name_H-M    'P 21/n'
 
loop_
 _symmetry_equiv_pos_as_xyz
 'x, y, z'
 '-x+1/2, y+1/2, -z+1/2'
 '-x, -y, -z'
 'x-1/2, -y-1/2, z-1/2'
 
_cell_length_a                    14.2074(12)
_cell_length_b                    16.275(2)
_cell_length_c                    16.712(3)
_cell_angle_alpha                 90.00
_cell_angle_beta                  92.6670(10)
_cell_angle_gamma                 90.00
_cell_volume                      3860.1(9)
_cell_formula_units_Z             4
_cell_measurement_temperature     173(2)
_cell_measurement_reflns_used     24995
_cell_measurement_theta_min       2.0
_cell_measurement_theta_max       30.05
 
_exptl_crystal_description        prism
_exptl_crystal_colour             'yellow-brown'
_exptl_crystal_size_max           0.35
_exptl_crystal_size_mid           0.25
_exptl_crystal_size_min           0.13
_exptl_crystal_density_meas       ?
_exptl_crystal_density_diffrn     1.455
_exptl_crystal_density_method     'not measured'
_exptl_crystal_F_000              1744
_exptl_absorpt_coefficient_mu     0.716
_exptl_absorpt_correction_type    multi-scan
_exptl_absorpt_correction_T_min   0.694
_exptl_absorpt_correction_T_max   0.911
_exptl_absorpt_process_details    ?
 
_exptl_special_details
;
 ?
;
 
_diffrn_ambient_temperature       173(2)
_diffrn_radiation_wavelength      0.71070
_diffrn_radiation_type            MoK\a
_diffrn_radiation_source          'fine-focus sealed tube'
_diffrn_radiation_monochromator   graphite
_diffrn_measurement_device_type   'Rigaku/ADSC CCD'
_diffrn_measurement_method        'area detector'
_diffrn_detector_area_resol_mean  ?
_diffrn_standards_number          ?
_diffrn_standards_interval_count  ?
_diffrn_standards_interval_time   ?
_diffrn_standards_decay_%         ?
_diffrn_reflns_number             35709
_diffrn_reflns_av_R_equivalents   0.0608
_diffrn_reflns_av_sigmaI/netI     0.1099
_diffrn_reflns_limit_h_min        -17
_diffrn_reflns_limit_h_max        19
_diffrn_reflns_limit_k_min        -22
_diffrn_reflns_limit_k_max        18
_diffrn_reflns_limit_l_min        -19
_diffrn_reflns_limit_l_max        23
_diffrn_reflns_theta_min          1.75
_diffrn_reflns_theta_max          30.04
_reflns_number_total              9923
_reflns_number_gt                 8391
_reflns_threshold_expression      >2\s(I)
 
_computing_data_collection        ?
_computing_cell_refinement        ?
_computing_data_reduction         ?
_computing_structure_solution     ?
_computing_structure_refinement   'SHELXL-97 (Sheldrick, 2008)'
_computing_molecular_graphics     ?
_computing_publication_material   ?
 
_refine_special_details
;
 Refinement of F^2^ against ALL reflections.  The weighted R-factor wR and
 goodness of fit S are based on F^2^, conventional R-factors R are based
 on F, with F set to zero for negative F^2^. The threshold expression of
 F^2^ > 2\s(F^2^) is used only for calculating R-factors(gt) etc. and is
 not relevant to the choice of reflections for refinement.  R-factors based
 on F^2^ are statistically about twice as large as those based on F, and R-
 factors based on ALL data will be even larger.
;
 
_refine_ls_structure_factor_coef  Fsqd
_refine_ls_matrix_type            full
_refine_ls_weighting_scheme       calc
_refine_ls_weighting_details
 'calc w=1/[\s^2^(Fo^2^)+(0.0000P)^2^+0.2914P] where P=(Fo^2^+2Fc^2^)/3'
_atom_sites_solution_primary      direct
_atom_sites_solution_secondary    difmap
_atom_sites_solution_hydrogens    geom
_refine_ls_hydrogen_treatment     mixed
_refine_ls_extinction_method      none
_refine_ls_extinction_coef        ?
_refine_ls_number_reflns          9923
_refine_ls_number_parameters      460
_refine_ls_number_restraints      0
_refine_ls_R_factor_all           0.0780
_refine_ls_R_factor_gt            0.0548
_refine_ls_wR_factor_ref          0.1256
_refine_ls_wR_factor_gt           0.1170
_refine_ls_goodness_of_fit_ref    1.181
_refine_ls_restrained_S_all       1.181
_refine_ls_shift/su_max           0.010
_refine_ls_shift/su_mean          0.000
 
loop_
 _atom_site_label
 _atom_site_type_symbol
 _atom_site_fract_x
 _atom_site_fract_y
 _atom_site_fract_z
 _atom_site_U_iso_or_equiv
 _atom_site_adp_type
 _atom_site_occupancy
 _atom_site_symmetry_multiplicity
 _atom_site_calc_flag
 _atom_site_refinement_flags
 _atom_site_disorder_assembly
 _atom_site_disorder_group
Ru1 Ru 0.563413(16) 0.272799(14) 0.156699(13) 0.01129(8) Uani 1 1 d . . .
Cl1 Cl 0.58012(6) 0.14833(5) 0.23573(5) 0.02327(18) Uani 1 1 d . . .
Cl2 Cl 0.58404(6) 0.19476(5) 0.03359(4) 0.02298(18) Uani 1 1 d . . .
S1 S 0.55644(6) 0.39497(5) 0.08291(5) 0.02159(18) Uani 1 1 d . . .
P1 P 0.57185(5) 0.35446(5) 0.26767(4) 0.01361(17) Uani 1 1 d . . .
P2 P 0.40444(5) 0.24445(5) 0.13885(4) 0.01212(16) Uani 1 1 d . . .
N1 N 0.72691(17) 0.28861(17) 0.16334(14) 0.0177(6) Uani 1 1 d . . .
C1 C 0.6987(2) 0.3747(2) 0.28259(18) 0.0198(7) Uani 1 1 d . . .
C2 C 0.7607(2) 0.3401(2) 0.23133(18) 0.0204(7) Uani 1 1 d . . .
C3 C 0.8570(2) 0.3552(3) 0.2431(2) 0.0370(10) Uani 1 1 d . . .
H3 H 0.9000 0.3314 0.2080 0.044 Uiso 1 1 calc R . .
C4 C 0.8905(2) 0.4048(3) 0.3055(2) 0.0466(12) Uani 1 1 d . . .
H4 H 0.9561 0.4157 0.3124 0.056 Uiso 1 1 calc R . .
C5 C 0.8286(3) 0.4382(3) 0.3578(2) 0.0445(11) Uani 1 1 d . . .
H5 H 0.8514 0.4718 0.4009 0.053 Uiso 1 1 calc R . .
C6 C 0.7336(2) 0.4226(2) 0.3469(2) 0.0305(8) Uani 1 1 d . . .
H6 H 0.6911 0.4447 0.3835 0.037 Uiso 1 1 calc R . .
C7 C 0.7610(2) 0.3250(3) 0.08700(19) 0.0296(8) Uani 1 1 d . . .
H7A H 0.7422 0.3829 0.0833 0.044 Uiso 1 1 calc R . .
H7B H 0.7331 0.2948 0.0410 0.044 Uiso 1 1 calc R . .
H7C H 0.8298 0.3210 0.0870 0.044 Uiso 1 1 calc R . .
C8 C 0.7709(2) 0.2057(2) 0.1700(2) 0.0305(8) Uani 1 1 d . . .
H8A H 0.8392 0.2106 0.1655 0.046 Uiso 1 1 calc R . .
H8B H 0.7448 0.1704 0.1269 0.046 Uiso 1 1 calc R . .
H8C H 0.7576 0.1814 0.2220 0.046 Uiso 1 1 calc R . .
C9 C 0.5443(2) 0.3310(2) 0.37260(17) 0.0172(6) Uani 1 1 d . . .
C10 C 0.5807(2) 0.2589(2) 0.40689(19) 0.0236(7) Uani 1 1 d . . .
H10 H 0.6143 0.2217 0.3750 0.028 Uiso 1 1 calc R . .
C11 C 0.5688(3) 0.2407(2) 0.4864(2) 0.0311(8) Uani 1 1 d . . .
H11 H 0.5945 0.1914 0.5088 0.037 Uiso 1 1 calc R . .
C12 C 0.5194(3) 0.2939(3) 0.5337(2) 0.0365(9) Uani 1 1 d . . .
H12 H 0.5104 0.2810 0.5882 0.044 Uiso 1 1 calc R . .
C13 C 0.4837(3) 0.3654(3) 0.5012(2) 0.0377(9) Uani 1 1 d . . .
H13 H 0.4498 0.4020 0.5335 0.045 Uiso 1 1 calc R . .
C14 C 0.4965(2) 0.3847(2) 0.42125(19) 0.0283(8) Uani 1 1 d . . .
H14 H 0.4724 0.4349 0.3998 0.034 Uiso 1 1 calc R . .
C15 C 0.5186(2) 0.45684(19) 0.25564(16) 0.0181(7) Uani 1 1 d . . .
C16 C 0.4213(2) 0.4630(2) 0.25688(19) 0.0254(7) Uani 1 1 d . . .
H16 H 0.3848 0.4152 0.2655 0.030 Uiso 1 1 calc R . .
C17 C 0.3768(3) 0.5383(2) 0.2456(2) 0.0333(9) Uani 1 1 d . . .
H17 H 0.3101 0.5421 0.2468 0.040 Uiso 1 1 calc R . .
C18 C 0.4295(3) 0.6076(2) 0.2327(2) 0.0403(10) Uani 1 1 d . . .
H18 H 0.3990 0.6592 0.2251 0.048 Uiso 1 1 calc R . .
C19 C 0.5254(3) 0.6026(2) 0.2307(2) 0.0374(9) Uani 1 1 d . . .
H19 H 0.5612 0.6506 0.2212 0.045 Uiso 1 1 calc R . .
C20 C 0.5708(3) 0.5274(2) 0.24251(19) 0.0276(8) Uani 1 1 d . . .
H20 H 0.6375 0.5244 0.2416 0.033 Uiso 1 1 calc R . .
C21 C 0.3482(2) 0.30209(19) 0.05514(17) 0.0164(6) Uani 1 1 d . . .
C22 C 0.3189(2) 0.3830(2) 0.06286(19) 0.0210(7) Uani 1 1 d . . .
H22 H 0.3233 0.4085 0.1140 0.025 Uiso 1 1 calc R . .
C23 C 0.2831(2) 0.4274(2) -0.0029(2) 0.0293(8) Uani 1 1 d . . .
H23 H 0.2624 0.4824 0.0035 0.035 Uiso 1 1 calc R . .
C24 C 0.2778(2) 0.3903(3) -0.0780(2) 0.0361(10) Uani 1 1 d . . .
H24 H 0.2534 0.4200 -0.1233 0.043 Uiso 1 1 calc R . .
C25 C 0.3078(2) 0.3109(3) -0.0866(2) 0.0323(9) Uani 1 1 d . . .
H25 H 0.3042 0.2861 -0.1382 0.039 Uiso 1 1 calc R . .
C26 C 0.3431(2) 0.2664(2) -0.02164(18) 0.0229(7) Uani 1 1 d . . .
H26 H 0.3641 0.2115 -0.0288 0.028 Uiso 1 1 calc R . .
C27 C 0.3279(2) 0.26213(19) 0.22308(18) 0.0173(7) Uani 1 1 d . . .
C28 C 0.3629(2) 0.2345(2) 0.29767(18) 0.0229(7) Uani 1 1 d . . .
H28 H 0.4232 0.2093 0.3028 0.028 Uiso 1 1 calc R . .
C29 C 0.3092(3) 0.2440(2) 0.3646(2) 0.0334(9) Uani 1 1 d . . .
H29 H 0.3330 0.2249 0.4154 0.040 Uiso 1 1 calc R . .
C30 C 0.2217(3) 0.2808(2) 0.3579(2) 0.0357(10) Uani 1 1 d . . .
H30 H 0.1856 0.2876 0.4040 0.043 Uiso 1 1 calc R . .
C31 C 0.1868(3) 0.3076(2) 0.2840(2) 0.0324(9) Uani 1 1 d . . .
H31 H 0.1268 0.3334 0.2794 0.039 Uiso 1 1 calc R . .
C32 C 0.2387(2) 0.2970(2) 0.2162(2) 0.0233(7) Uani 1 1 d . . .
H32 H 0.2131 0.3136 0.1652 0.028 Uiso 1 1 calc R . .
C33 C 0.3647(2) 0.13903(19) 0.11120(17) 0.0177(6) Uani 1 1 d . . .
C34 C 0.4240(2) 0.07312(19) 0.10032(18) 0.0213(7) Uani 1 1 d . . .
H34 H 0.4900 0.0796 0.1098 0.026 Uiso 1 1 calc R . .
C35 C 0.3879(3) -0.0028(2) 0.0756(2) 0.0317(8) Uani 1 1 d . . .
H35 H 0.4294 -0.0476 0.0683 0.038 Uiso 1 1 calc R . .
C36 C 0.2915(3) -0.0133(2) 0.0615(2) 0.0319(9) Uani 1 1 d . . .
H36 H 0.2672 -0.0652 0.0445 0.038 Uiso 1 1 calc R . .
C37 C 0.2315(3) 0.0517(2) 0.0723(2) 0.0334(9) Uani 1 1 d . . .
H37 H 0.1655 0.0447 0.0629 0.040 Uiso 1 1 calc R . .
C38 C 0.2671(2) 0.1278(2) 0.09704(19) 0.0255(7) Uani 1 1 d . . .
H38 H 0.2253 0.1724 0.1044 0.031 Uiso 1 1 calc R . .
C39 C 0.5506(2) 0.3848(2) -0.02460(18) 0.0274(8) Uani 1 1 d . . .
H39A H 0.6116 0.3659 -0.0425 0.041 Uiso 1 1 calc R . .
H39B H 0.5353 0.4382 -0.0491 0.041 Uiso 1 1 calc R . .
H39C H 0.5017 0.3448 -0.0407 0.041 Uiso 1 1 calc R . .
O1 O 0.4601(2) -0.10894(19) 0.37027(18) 0.0532(8) Uani 1 1 d . . .
C40 C 0.4626(3) -0.0351(3) 0.3666(2) 0.0395(10) Uani 1 1 d . . .
C41 C 0.3850(3) 0.0116(3) 0.3245(3) 0.0665(15) Uani 1 1 d . . .
H41A H 0.3350 -0.0265 0.3064 0.100 Uiso 1 1 calc R . .
H41B H 0.4094 0.0401 0.2781 0.100 Uiso 1 1 calc R . .
H41C H 0.3595 0.0520 0.3612 0.100 Uiso 1 1 calc R . .
C42 C 0.5448(4) 0.0128(3) 0.3998(3) 0.0714(16) Uani 1 1 d . . .
H42A H 0.5870 -0.0237 0.4314 0.107 Uiso 1 1 calc R . .
H42B H 0.5227 0.0569 0.4341 0.107 Uiso 1 1 calc R . .
H42C H 0.5789 0.0366 0.3557 0.107 Uiso 1 1 calc R . .
H1 H 0.487(3) 0.416(3) 0.091(2) 0.062(13) Uiso 1 1 d . . .
 
loop_
 _atom_site_aniso_label
 _atom_site_aniso_U_11
 _atom_site_aniso_U_22
 _atom_site_aniso_U_33
 _atom_site_aniso_U_23
 _atom_site_aniso_U_13
 _atom_site_aniso_U_12
Ru1 0.01544(13) 0.01072(14) 0.00803(14) 0.00006(8) 0.00393(10) 0.00183(9)
Cl1 0.0341(4) 0.0159(4) 0.0197(4) 0.0050(3) -0.0005(3) 0.0041(3)
Cl2 0.0314(4) 0.0221(4) 0.0161(4) -0.0069(3) 0.0084(3) 0.0010(3)
S1 0.0350(5) 0.0156(4) 0.0144(4) 0.0028(3) 0.0037(4) -0.0032(3)
P1 0.0169(4) 0.0140(4) 0.0102(4) -0.0010(3) 0.0037(3) -0.0001(3)
P2 0.0177(4) 0.0089(4) 0.0101(4) -0.0006(3) 0.0036(3) 0.0003(3)
N1 0.0187(13) 0.0236(15) 0.0112(13) -0.0002(10) 0.0065(10) 0.0030(11)
C1 0.0167(15) 0.0243(18) 0.0184(17) 0.0002(13) 0.0003(13) -0.0025(13)
C2 0.0207(15) 0.0284(19) 0.0123(16) 0.0007(13) 0.0023(13) -0.0022(13)
C3 0.0189(17) 0.061(3) 0.031(2) -0.0086(19) 0.0048(15) -0.0054(17)
C4 0.0212(19) 0.082(3) 0.036(2) -0.015(2) -0.0018(17) -0.015(2)
C5 0.035(2) 0.074(3) 0.024(2) -0.017(2) 0.0002(17) -0.020(2)
C6 0.0253(17) 0.042(2) 0.0240(19) -0.0102(16) 0.0014(15) -0.0066(16)
C7 0.0227(17) 0.048(2) 0.0188(18) 0.0020(16) 0.0079(14) -0.0042(16)
C8 0.0226(17) 0.033(2) 0.036(2) -0.0030(17) 0.0036(16) 0.0097(15)
C9 0.0178(14) 0.0224(17) 0.0115(15) -0.0028(12) 0.0011(12) -0.0046(12)
C10 0.0302(18) 0.0235(19) 0.0170(17) 0.0032(13) 0.0016(14) 0.0006(14)
C11 0.040(2) 0.034(2) 0.0189(19) 0.0084(15) -0.0002(16) -0.0003(17)
C12 0.044(2) 0.052(3) 0.0135(18) 0.0053(17) 0.0055(17) -0.0077(19)
C13 0.049(2) 0.049(3) 0.0170(19) -0.0055(17) 0.0171(17) 0.004(2)
C14 0.038(2) 0.028(2) 0.0202(18) -0.0010(14) 0.0074(15) 0.0069(16)
C15 0.0298(17) 0.0160(16) 0.0083(15) -0.0045(12) -0.0009(13) 0.0014(13)
C16 0.0321(18) 0.0223(19) 0.0213(18) -0.0049(14) -0.0030(15) 0.0065(14)
C17 0.037(2) 0.031(2) 0.031(2) -0.0088(16) -0.0058(17) 0.0146(17)
C18 0.071(3) 0.022(2) 0.027(2) -0.0036(15) -0.008(2) 0.0190(19)
C19 0.064(3) 0.0149(19) 0.033(2) 0.0018(15) 0.0034(19) -0.0023(17)
C20 0.0364(19) 0.0209(19) 0.0258(19) 0.0015(14) 0.0040(16) -0.0043(15)
C21 0.0157(14) 0.0172(16) 0.0162(16) 0.0035(12) 0.0003(12) -0.0047(12)
C22 0.0232(16) 0.0200(18) 0.0197(17) 0.0065(13) -0.0013(13) -0.0029(13)
C23 0.0243(17) 0.024(2) 0.040(2) 0.0162(16) 0.0033(16) 0.0022(14)
C24 0.0269(19) 0.050(3) 0.031(2) 0.0220(18) -0.0065(16) -0.0046(17)
C25 0.0276(18) 0.053(3) 0.0160(18) 0.0062(17) -0.0009(15) -0.0114(17)
C26 0.0249(17) 0.030(2) 0.0137(17) 0.0004(13) 0.0016(14) -0.0083(14)
C27 0.0258(16) 0.0121(16) 0.0146(16) -0.0027(12) 0.0086(13) -0.0050(12)
C28 0.0334(19) 0.0217(19) 0.0144(17) 0.0003(13) 0.0087(15) -0.0065(14)
C29 0.052(2) 0.034(2) 0.0153(18) -0.0024(15) 0.0101(17) -0.0141(18)
C30 0.051(2) 0.030(2) 0.028(2) -0.0121(16) 0.0282(18) -0.0158(18)
C31 0.0310(19) 0.022(2) 0.046(2) -0.0046(16) 0.0257(17) -0.0013(15)
C32 0.0253(17) 0.0171(17) 0.0282(18) -0.0023(14) 0.0085(15) 0.0012(13)
C33 0.0297(17) 0.0135(16) 0.0101(15) -0.0007(11) 0.0036(13) -0.0016(13)
C34 0.0294(17) 0.0158(17) 0.0186(17) 0.0015(13) -0.0010(14) 0.0005(13)
C35 0.055(2) 0.0172(19) 0.0224(19) -0.0021(14) -0.0059(17) 0.0046(16)
C36 0.055(2) 0.0146(18) 0.0264(19) -0.0009(14) 0.0018(17) -0.0141(16)
C37 0.037(2) 0.032(2) 0.031(2) -0.0044(16) 0.0070(17) -0.0185(17)
C38 0.0267(17) 0.0217(19) 0.0288(19) -0.0050(14) 0.0101(15) -0.0071(14)
C39 0.040(2) 0.027(2) 0.0147(17) 0.0052(14) 0.0001(15) -0.0048(16)
O1 0.0532(18) 0.0367(19) 0.071(2) 0.0203(16) 0.0116(15) -0.0019(14)
C40 0.040(2) 0.039(3) 0.041(2) 0.0176(19) 0.0159(19) -0.0088(18)
C41 0.049(3) 0.040(3) 0.110(4) 0.026(3) 0.002(3) 0.000(2)
C42 0.080(4) 0.068(4) 0.065(3) 0.021(3) -0.018(3) -0.032(3)
 
_geom_special_details
;
 All s.u.'s (except the s.u. in the dihedral angle between two l.s. planes)
 are estimated using the full covariance matrix.  The cell s.u.'s are taken
 into account individually in the estimation of s.u.'s in distances, angles
 and torsion angles; correlations between s.u.'s in cell parameters are only
 used when they are defined by crystal symmetry.  An approximate (isotropic)
 treatment of cell s.u.'s is used for estimating s.u.'s involving l.s. planes.
;
 
loop_
 _geom_bond_atom_site_label_1
 _geom_bond_atom_site_label_2
 _geom_bond_distance
 _geom_bond_site_symmetry_2
 _geom_bond_publ_flag
Ru1 P1 2.2802(8) . ?
Ru1 P2 2.3109(8) . ?
Ru1 N1 2.335(2) . ?
Ru1 S1 2.3393(8) . ?
Ru1 Cl1 2.4238(8) . ?
Ru1 Cl2 2.4470(8) . ?
S1 C39 1.802(3) . ?
S1 H1 1.06(4) . ?
P1 C15 1.837(3) . ?
P1 C1 1.838(3) . ?
P1 C9 1.854(3) . ?
P2 C21 1.836(3) . ?
P2 C27 1.841(3) . ?
P2 C33 1.858(3) . ?
N1 C2 1.474(4) . ?
N1 C8 1.490(4) . ?
N1 C7 1.507(4) . ?
C1 C2 1.377(4) . ?
C1 C6 1.399(4) . ?
C2 C3 1.395(4) . ?
C3 C4 1.385(5) . ?
C3 H3 0.9500 . ?
C4 C5 1.379(6) . ?
C4 H4 0.9500 . ?
C5 C6 1.378(5) . ?
C5 H5 0.9500 . ?
C6 H6 0.9500 . ?
C7 H7A 0.9800 . ?
C7 H7B 0.9800 . ?
C7 H7C 0.9800 . ?
C8 H8A 0.9800 . ?
C8 H8B 0.9800 . ?
C8 H8C 0.9800 . ?
C9 C14 1.392(4) . ?
C9 C10 1.394(4) . ?
C10 C11 1.379(5) . ?
C10 H10 0.9500 . ?
C11 C12 1.385(5) . ?
C11 H11 0.9500 . ?
C12 C13 1.371(6) . ?
C12 H12 0.9500 . ?
C13 C14 1.393(5) . ?
C13 H13 0.9500 . ?
C14 H14 0.9500 . ?
C15 C16 1.387(4) . ?
C15 C20 1.390(5) . ?
C16 C17 1.389(5) . ?
C16 H16 0.9500 . ?
C17 C18 1.376(6) . ?
C17 H17 0.9500 . ?
C18 C19 1.367(5) . ?
C18 H18 0.9500 . ?
C19 C20 1.393(5) . ?
C19 H19 0.9500 . ?
C20 H20 0.9500 . ?
C21 C22 1.389(5) . ?
C21 C26 1.408(4) . ?
C22 C23 1.391(4) . ?
C22 H22 0.9500 . ?
C23 C24 1.392(5) . ?
C23 H23 0.9500 . ?
C24 C25 1.370(6) . ?
C24 H24 0.9500 . ?
C25 C26 1.381(5) . ?
C25 H25 0.9500 . ?
C26 H26 0.9500 . ?
C27 C32 1.389(4) . ?
C27 C28 1.394(4) . ?
C28 C29 1.391(5) . ?
C28 H28 0.9500 . ?
C29 C30 1.380(5) . ?
C29 H29 0.9500 . ?
C30 C31 1.380(5) . ?
C30 H30 0.9500 . ?
C31 C32 1.392(4) . ?
C31 H31 0.9500 . ?
C32 H32 0.9500 . ?
C33 C34 1.381(4) . ?
C33 C38 1.408(4) . ?
C34 C35 1.393(5) . ?
C34 H34 0.9500 . ?
C35 C36 1.389(5) . ?
C35 H35 0.9500 . ?
C36 C37 1.377(5) . ?
C36 H36 0.9500 . ?
C37 C38 1.394(5) . ?
C37 H37 0.9500 . ?
C38 H38 0.9500 . ?
C39 H39A 0.9800 . ?
C39 H39B 0.9800 . ?
C39 H39C 0.9800 . ?
O1 C40 1.205(5) . ?
C40 C42 1.489(6) . ?
C40 C41 1.489(5) . ?
C41 H41A 0.9800 . ?
C41 H41B 0.9800 . ?
C41 H41C 0.9800 . ?
C42 H42A 0.9800 . ?
C42 H42B 0.9800 . ?
C42 H42C 0.9800 . ?
 
loop_
 _geom_angle_atom_site_label_1
 _geom_angle_atom_site_label_2
 _geom_angle_atom_site_label_3
 _geom_angle
 _geom_angle_site_symmetry_1
 _geom_angle_site_symmetry_3
 _geom_angle_publ_flag
P1 Ru1 P2 103.62(3) . . ?
P1 Ru1 N1 83.26(6) . . ?
P2 Ru1 N1 172.96(7) . . ?
P1 Ru1 S1 86.14(3) . . ?
P2 Ru1 S1 94.85(3) . . ?
N1 Ru1 S1 87.08(7) . . ?
P1 Ru1 Cl1 92.51(3) . . ?
P2 Ru1 Cl1 88.50(3) . . ?
N1 Ru1 Cl1 89.67(7) . . ?
S1 Ru1 Cl1 176.60(3) . . ?
P1 Ru1 Cl2 169.27(3) . . ?
P2 Ru1 Cl2 86.70(3) . . ?
N1 Ru1 Cl2 86.52(6) . . ?
S1 Ru1 Cl2 90.10(3) . . ?
Cl1 Ru1 Cl2 90.68(3) . . ?
C39 S1 Ru1 116.50(12) . . ?
C39 S1 H1 99(2) . . ?
Ru1 S1 H1 102(2) . . ?
C15 P1 C1 104.39(15) . . ?
C15 P1 C9 100.76(14) . . ?
C1 P1 C9 99.05(13) . . ?
C15 P1 Ru1 115.71(9) . . ?
C1 P1 Ru1 103.24(10) . . ?
C9 P1 Ru1 130.06(10) . . ?
C21 P2 C27 104.55(14) . . ?
C21 P2 C33 99.55(13) . . ?
C27 P2 C33 98.70(14) . . ?
C21 P2 Ru1 112.61(10) . . ?
C27 P2 Ru1 118.58(10) . . ?
C33 P2 Ru1 120.01(10) . . ?
C2 N1 C8 109.7(2) . . ?
C2 N1 C7 108.9(3) . . ?
C8 N1 C7 105.6(3) . . ?
C2 N1 Ru1 112.76(18) . . ?
C8 N1 Ru1 108.5(2) . . ?
C7 N1 Ru1 111.17(18) . . ?
C2 C1 C6 119.5(3) . . ?
C2 C1 P1 119.6(2) . . ?
C6 C1 P1 120.9(2) . . ?
C1 C2 C3 119.4(3) . . ?
C1 C2 N1 121.2(3) . . ?
C3 C2 N1 119.4(3) . . ?
C4 C3 C2 120.6(3) . . ?
C4 C3 H3 119.7 . . ?
C2 C3 H3 119.7 . . ?
C5 C4 C3 120.0(3) . . ?
C5 C4 H4 120.0 . . ?
C3 C4 H4 120.0 . . ?
C6 C5 C4 119.5(3) . . ?
C6 C5 H5 120.2 . . ?
C4 C5 H5 120.2 . . ?
C5 C6 C1 120.9(3) . . ?
C5 C6 H6 119.5 . . ?
C1 C6 H6 119.5 . . ?
N1 C7 H7A 109.5 . . ?
N1 C7 H7B 109.5 . . ?
H7A C7 H7B 109.5 . . ?
N1 C7 H7C 109.5 . . ?
H7A C7 H7C 109.5 . . ?
H7B C7 H7C 109.5 . . ?
N1 C8 H8A 109.5 . . ?
N1 C8 H8B 109.5 . . ?
H8A C8 H8B 109.5 . . ?
N1 C8 H8C 109.5 . . ?
H8A C8 H8C 109.5 . . ?
H8B C8 H8C 109.5 . . ?
C14 C9 C10 118.0(3) . . ?
C14 C9 P1 123.6(3) . . ?
C10 C9 P1 118.2(2) . . ?
C11 C10 C9 121.1(3) . . ?
C11 C10 H10 119.4 . . ?
C9 C10 H10 119.4 . . ?
C10 C11 C12 120.2(3) . . ?
C10 C11 H11 119.9 . . ?
C12 C11 H11 119.9 . . ?
C13 C12 C11 119.5(3) . . ?
C13 C12 H12 120.2 . . ?
C11 C12 H12 120.2 . . ?
C12 C13 C14 120.6(4) . . ?
C12 C13 H13 119.7 . . ?
C14 C13 H13 119.7 . . ?
C9 C14 C13 120.5(3) . . ?
C9 C14 H14 119.7 . . ?
C13 C14 H14 119.7 . . ?
C16 C15 C20 118.8(3) . . ?
C16 C15 P1 118.0(2) . . ?
C20 C15 P1 123.1(3) . . ?
C15 C16 C17 120.6(3) . . ?
C15 C16 H16 119.7 . . ?
C17 C16 H16 119.7 . . ?
C18 C17 C16 119.8(4) . . ?
C18 C17 H17 120.1 . . ?
C16 C17 H17 120.1 . . ?
C19 C18 C17 120.3(4) . . ?
C19 C18 H18 119.9 . . ?
C17 C18 H18 119.9 . . ?
C18 C19 C20 120.3(4) . . ?
C18 C19 H19 119.8 . . ?
C20 C19 H19 119.8 . . ?
C15 C20 C19 120.1(3) . . ?
C15 C20 H20 120.0 . . ?
C19 C20 H20 120.0 . . ?
C22 C21 C26 118.2(3) . . ?
C22 C21 P2 122.4(2) . . ?
C26 C21 P2 119.1(2) . . ?
C21 C22 C23 121.3(3) . . ?
C21 C22 H22 119.4 . . ?
C23 C22 H22 119.4 . . ?
C22 C23 C24 119.3(3) . . ?
C22 C23 H23 120.3 . . ?
C24 C23 H23 120.3 . . ?
C25 C24 C23 120.0(3) . . ?
C25 C24 H24 120.0 . . ?
C23 C24 H24 120.0 . . ?
C24 C25 C26 121.0(3) . . ?
C24 C25 H25 119.5 . . ?
C26 C25 H25 119.5 . . ?
C25 C26 C21 120.1(3) . . ?
C25 C26 H26 119.9 . . ?
C21 C26 H26 119.9 . . ?
C32 C27 C28 119.4(3) . . ?
C32 C27 P2 124.7(2) . . ?
C28 C27 P2 115.8(2) . . ?
C29 C28 C27 119.9(3) . . ?
C29 C28 H28 120.1 . . ?
C27 C28 H28 120.1 . . ?
C30 C29 C28 120.5(3) . . ?
C30 C29 H29 119.7 . . ?
C28 C29 H29 119.7 . . ?
C31 C30 C29 119.6(3) . . ?
C31 C30 H30 120.2 . . ?
C29 C30 H30 120.2 . . ?
C30 C31 C32 120.6(3) . . ?
C30 C31 H31 119.7 . . ?
C32 C31 H31 119.7 . . ?
C27 C32 C31 119.9(3) . . ?
C27 C32 H32 120.0 . . ?
C31 C32 H32 120.0 . . ?
C34 C33 C38 118.6(3) . . ?
C34 C33 P2 124.8(2) . . ?
C38 C33 P2 116.6(2) . . ?
C33 C34 C35 120.6(3) . . ?
C33 C34 H34 119.7 . . ?
C35 C34 H34 119.7 . . ?
C36 C35 C34 120.4(3) . . ?
C36 C35 H35 119.8 . . ?
C34 C35 H35 119.8 . . ?
C37 C36 C35 119.7(3) . . ?
C37 C36 H36 120.2 . . ?
C35 C36 H36 120.2 . . ?
C36 C37 C38 120.2(3) . . ?
C36 C37 H37 119.9 . . ?
C38 C37 H37 119.9 . . ?
C37 C38 C33 120.5(3) . . ?
C37 C38 H38 119.8 . . ?
C33 C38 H38 119.8 . . ?
S1 C39 H39A 109.5 . . ?
S1 C39 H39B 109.5 . . ?
H39A C39 H39B 109.5 . . ?
S1 C39 H39C 109.5 . . ?
H39A C39 H39C 109.5 . . ?
H39B C39 H39C 109.5 . . ?
O1 C40 C42 121.8(4) . . ?
O1 C40 C41 120.7(4) . . ?
C42 C40 C41 117.4(4) . . ?
C40 C41 H41A 109.5 . . ?
C40 C41 H41B 109.5 . . ?
H41A C41 H41B 109.5 . . ?
C40 C41 H41C 109.5 . . ?
H41A C41 H41C 109.5 . . ?
H41B C41 H41C 109.5 . . ?
C40 C42 H42A 109.5 . . ?
C40 C42 H42B 109.5 . . ?
H42A C42 H42B 109.5 . . ?
C40 C42 H42C 109.5 . . ?
H42A C42 H42C 109.5 . . ?
H42B C42 H42C 109.5 . . ?
 
loop_
 _geom_torsion_atom_site_label_1
 _geom_torsion_atom_site_label_2
 _geom_torsion_atom_site_label_3
 _geom_torsion_atom_site_label_4
 _geom_torsion
 _geom_torsion_site_symmetry_1
 _geom_torsion_site_symmetry_2
 _geom_torsion_site_symmetry_3
 _geom_torsion_site_symmetry_4
 _geom_torsion_publ_flag
P1 Ru1 S1 C39 178.55(14) . . . . ?
P2 Ru1 S1 C39 -78.09(13) . . . . ?
N1 Ru1 S1 C39 95.12(15) . . . . ?
Cl1 Ru1 S1 C39 111.8(5) . . . . ?
Cl2 Ru1 S1 C39 8.60(13) . . . . ?
P2 Ru1 P1 C15 -67.85(12) . . . . ?
N1 Ru1 P1 C15 113.72(13) . . . . ?
S1 Ru1 P1 C15 26.21(12) . . . . ?
Cl1 Ru1 P1 C15 -156.91(12) . . . . ?
Cl2 Ru1 P1 C15 95.92(19) . . . . ?
P2 Ru1 P1 C1 178.79(11) . . . . ?
N1 Ru1 P1 C1 0.36(12) . . . . ?
S1 Ru1 P1 C1 -87.15(11) . . . . ?
Cl1 Ru1 P1 C1 89.72(11) . . . . ?
Cl2 Ru1 P1 C1 -17.4(2) . . . . ?
P2 Ru1 P1 C9 64.65(13) . . . . ?
N1 Ru1 P1 C9 -113.78(14) . . . . ?
S1 Ru1 P1 C9 158.71(13) . . . . ?
Cl1 Ru1 P1 C9 -24.41(13) . . . . ?
Cl2 Ru1 P1 C9 -131.58(18) . . . . ?
P1 Ru1 P2 C21 105.25(11) . . . . ?
N1 Ru1 P2 C21 -87.6(5) . . . . ?
S1 Ru1 P2 C21 18.05(11) . . . . ?
Cl1 Ru1 P2 C21 -162.53(11) . . . . ?
Cl2 Ru1 P2 C21 -71.77(11) . . . . ?
P1 Ru1 P2 C27 -17.22(12) . . . . ?
N1 Ru1 P2 C27 150.0(5) . . . . ?
S1 Ru1 P2 C27 -104.41(12) . . . . ?
Cl1 Ru1 P2 C27 75.00(12) . . . . ?
Cl2 Ru1 P2 C27 165.77(12) . . . . ?
P1 Ru1 P2 C33 -138.13(11) . . . . ?
N1 Ru1 P2 C33 29.1(6) . . . . ?
S1 Ru1 P2 C33 134.68(11) . . . . ?
Cl1 Ru1 P2 C33 -45.91(11) . . . . ?
Cl2 Ru1 P2 C33 44.86(11) . . . . ?
P1 Ru1 N1 C2 0.27(19) . . . . ?
P2 Ru1 N1 C2 -167.2(4) . . . . ?
S1 Ru1 N1 C2 86.72(19) . . . . ?
Cl1 Ru1 N1 C2 -92.31(19) . . . . ?
Cl2 Ru1 N1 C2 177.00(19) . . . . ?
P1 Ru1 N1 C8 121.95(19) . . . . ?
P2 Ru1 N1 C8 -45.5(6) . . . . ?
S1 Ru1 N1 C8 -151.59(19) . . . . ?
Cl1 Ru1 N1 C8 29.38(19) . . . . ?
Cl2 Ru1 N1 C8 -61.32(19) . . . . ?
P1 Ru1 N1 C7 -122.3(2) . . . . ?
P2 Ru1 N1 C7 70.2(6) . . . . ?
S1 Ru1 N1 C7 -35.9(2) . . . . ?
Cl1 Ru1 N1 C7 145.1(2) . . . . ?
Cl2 Ru1 N1 C7 54.4(2) . . . . ?
C15 P1 C1 C2 -122.5(3) . . . . ?
C9 P1 C1 C2 133.9(3) . . . . ?
Ru1 P1 C1 C2 -1.1(3) . . . . ?
C15 P1 C1 C6 59.7(3) . . . . ?
C9 P1 C1 C6 -44.0(3) . . . . ?
Ru1 P1 C1 C6 -179.0(3) . . . . ?
C6 C1 C2 C3 -1.7(5) . . . . ?
P1 C1 C2 C3 -179.7(3) . . . . ?
C6 C1 C2 N1 179.4(3) . . . . ?
P1 C1 C2 N1 1.5(4) . . . . ?
C8 N1 C2 C1 -122.1(3) . . . . ?
C7 N1 C2 C1 122.8(3) . . . . ?
Ru1 N1 C2 C1 -1.1(4) . . . . ?
C8 N1 C2 C3 59.1(4) . . . . ?
C7 N1 C2 C3 -56.0(4) . . . . ?
Ru1 N1 C2 C3 -179.9(3) . . . . ?
C1 C2 C3 C4 -0.2(6) . . . . ?
N1 C2 C3 C4 178.7(4) . . . . ?
C2 C3 C4 C5 1.4(7) . . . . ?
C3 C4 C5 C6 -0.6(7) . . . . ?
C4 C5 C6 C1 -1.4(6) . . . . ?
C2 C1 C6 C5 2.5(6) . . . . ?
P1 C1 C6 C5 -179.6(3) . . . . ?
C15 P1 C9 C14 -0.9(3) . . . . ?
C1 P1 C9 C14 105.8(3) . . . . ?
Ru1 P1 C9 C14 -138.3(2) . . . . ?
C15 P1 C9 C10 -175.0(2) . . . . ?
C1 P1 C9 C10 -68.3(3) . . . . ?
Ru1 P1 C9 C10 47.6(3) . . . . ?
C14 C9 C10 C11 0.8(5) . . . . ?
P1 C9 C10 C11 175.2(3) . . . . ?
C9 C10 C11 C12 0.5(5) . . . . ?
C10 C11 C12 C13 -0.9(6) . . . . ?
C11 C12 C13 C14 0.1(6) . . . . ?
C10 C9 C14 C13 -1.6(5) . . . . ?
P1 C9 C14 C13 -175.7(3) . . . . ?
C12 C13 C14 C9 1.2(6) . . . . ?
C1 P1 C15 C16 -169.2(2) . . . . ?
C9 P1 C15 C16 -66.9(3) . . . . ?
Ru1 P1 C15 C16 78.1(3) . . . . ?
C1 P1 C15 C20 13.2(3) . . . . ?
C9 P1 C15 C20 115.6(3) . . . . ?
Ru1 P1 C15 C20 -99.5(3) . . . . ?
C20 C15 C16 C17 -0.3(5) . . . . ?
P1 C15 C16 C17 -178.0(2) . . . . ?
C15 C16 C17 C18 0.3(5) . . . . ?
C16 C17 C18 C19 0.1(6) . . . . ?
C17 C18 C19 C20 -0.6(6) . . . . ?
C16 C15 C20 C19 -0.2(5) . . . . ?
P1 C15 C20 C19 177.4(3) . . . . ?
C18 C19 C20 C15 0.6(5) . . . . ?
C27 P2 C21 C22 48.3(3) . . . . ?
C33 P2 C21 C22 149.9(3) . . . . ?
Ru1 P2 C21 C22 -81.8(3) . . . . ?
C27 P2 C21 C26 -138.4(2) . . . . ?
C33 P2 C21 C26 -36.7(3) . . . . ?
Ru1 P2 C21 C26 91.5(2) . . . . ?
C26 C21 C22 C23 1.6(4) . . . . ?
P2 C21 C22 C23 175.0(2) . . . . ?
C21 C22 C23 C24 -0.9(5) . . . . ?
C22 C23 C24 C25 0.0(5) . . . . ?
C23 C24 C25 C26 0.2(5) . . . . ?
C24 C25 C26 C21 0.5(5) . . . . ?
C22 C21 C26 C25 -1.4(4) . . . . ?
P2 C21 C26 C25 -175.0(2) . . . . ?
C21 P2 C27 C32 12.0(3) . . . . ?
C33 P2 C27 C32 -90.3(3) . . . . ?
Ru1 P2 C27 C32 138.4(2) . . . . ?
C21 P2 C27 C28 -170.9(2) . . . . ?
C33 P2 C27 C28 86.8(3) . . . . ?
Ru1 P2 C27 C28 -44.5(3) . . . . ?
C32 C27 C28 C29 -1.6(5) . . . . ?
P2 C27 C28 C29 -178.9(3) . . . . ?
C27 C28 C29 C30 -0.2(5) . . . . ?
C28 C29 C30 C31 0.7(5) . . . . ?
C29 C30 C31 C32 0.7(5) . . . . ?
C28 C27 C32 C31 3.0(5) . . . . ?
P2 C27 C32 C31 -180.0(3) . . . . ?
C30 C31 C32 C27 -2.5(5) . . . . ?
C21 P2 C33 C34 123.6(3) . . . . ?
C27 P2 C33 C34 -129.9(3) . . . . ?
Ru1 P2 C33 C34 0.4(3) . . . . ?
C21 P2 C33 C38 -53.4(3) . . . . ?
C27 P2 C33 C38 53.1(3) . . . . ?
Ru1 P2 C33 C38 -176.56(19) . . . . ?
C38 C33 C34 C35 0.2(5) . . . . ?
P2 C33 C34 C35 -176.7(2) . . . . ?
C33 C34 C35 C36 0.0(5) . . . . ?
C34 C35 C36 C37 -0.2(5) . . . . ?
C35 C36 C37 C38 0.2(5) . . . . ?
C36 C37 C38 C33 0.0(5) . . . . ?
C34 C33 C38 C37 -0.2(5) . . . . ?
P2 C33 C38 C37 177.0(3) . . . . ?
 
_diffrn_measured_fraction_theta_max    0.878
_diffrn_reflns_theta_full              25.00
_diffrn_measured_fraction_theta_full   0.984
_refine_diff_density_max    0.566
_refine_diff_density_min   -1.497
_refine_diff_density_rms    0.098

 
data_bj239
 
_audit_creation_method            SHELXL-97
_chemical_name_systematic
;
 ?
;
_chemical_name_common             ?
_chemical_melting_point           ?
_chemical_formula_moiety          ?
_chemical_formula_sum
 'C49 H50 Cl2 N P2 Ru S'
_chemical_formula_weight          918.87
 
loop_
 _atom_type_symbol
 _atom_type_description
 _atom_type_scat_dispersion_real
 _atom_type_scat_dispersion_imag
 _atom_type_scat_source
 'C'  'C'   0.0033   0.0016
 'International Tables Vol C Tables 4.2.6.8 and 6.1.1.4'
 'H'  'H'   0.0000   0.0000
 'International Tables Vol C Tables 4.2.6.8 and 6.1.1.4'
 'N'  'N'   0.0061   0.0033
 'International Tables Vol C Tables 4.2.6.8 and 6.1.1.4'
 'P'  'P'   0.1023   0.0942
 'International Tables Vol C Tables 4.2.6.8 and 6.1.1.4'
 'S'  'S'   0.1246   0.1234
 'International Tables Vol C Tables 4.2.6.8 and 6.1.1.4'
 'Cl'  'Cl'   0.1484   0.1585
 'International Tables Vol C Tables 4.2.6.8 and 6.1.1.4'
 'Ru'  'Ru'  -1.2594   0.8363
 'International Tables Vol C Tables 4.2.6.8 and 6.1.1.4'
 
_symmetry_cell_setting            monoclinic
_symmetry_space_group_name_H-M    'P 21/n'
 
loop_
 _symmetry_equiv_pos_as_xyz
 'x, y, z'
 '-x+1/2, y+1/2, -z+1/2'
 '-x, -y, -z'
 'x-1/2, -y-1/2, z-1/2'
 
_cell_length_a                    16.6933(8)
_cell_length_b                    12.4262(12)
_cell_length_c                    21.8288(6)
_cell_angle_alpha                 90.00
_cell_angle_beta                  106.3310(10)
_cell_angle_gamma                 90.00
_cell_volume                      4345.3(5)
_cell_formula_units_Z             4
_cell_measurement_temperature     180(2)
_cell_measurement_reflns_used     25252
_cell_measurement_theta_min       2.0
_cell_measurement_theta_max       30.05
 
_exptl_crystal_description        prism
_exptl_crystal_colour             yellow
_exptl_crystal_size_max           0.30
_exptl_crystal_size_mid           0.30
_exptl_crystal_size_min           0.20
_exptl_crystal_density_meas       ?
_exptl_crystal_density_diffrn     1.405
_exptl_crystal_density_method     'not measured'
_exptl_crystal_F_000              1900
_exptl_absorpt_coefficient_mu     0.641
_exptl_absorpt_correction_type    multi-scan
_exptl_absorpt_correction_T_min   0.638
_exptl_absorpt_correction_T_max   0.880
_exptl_absorpt_process_details    ?
 
_exptl_special_details
;
 ?
;
 
_diffrn_ambient_temperature       180(2)
_diffrn_radiation_wavelength      0.71070
_diffrn_radiation_type            MoK\a
_diffrn_radiation_source          'fine-focus sealed tube'
_diffrn_radiation_monochromator   graphite
_diffrn_measurement_device_type   'Rigaku/ADSC CCD'
_diffrn_measurement_method        'area detector'
_diffrn_detector_area_resol_mean  ?
_diffrn_standards_number          ?
_diffrn_standards_interval_count  ?
_diffrn_standards_interval_time   ?
_diffrn_standards_decay_%         ?
_diffrn_reflns_number             38226
_diffrn_reflns_av_R_equivalents   0.0305
_diffrn_reflns_av_sigmaI/netI     0.0316
_diffrn_reflns_limit_h_min        -19
_diffrn_reflns_limit_h_max        23
_diffrn_reflns_limit_k_min        -15
_diffrn_reflns_limit_k_max        17
_diffrn_reflns_limit_l_min        -30
_diffrn_reflns_limit_l_max        26
_diffrn_reflns_theta_min          1.91
_diffrn_reflns_theta_max          30.08
_reflns_number_total              11499
_reflns_number_gt                 8808
_reflns_threshold_expression      >2\s(I)
 
_computing_data_collection        ?
_computing_cell_refinement        ?
_computing_data_reduction         ?
_computing_structure_solution     ?
_computing_structure_refinement   'SHELXL-97 (Sheldrick, 2008)'
_computing_molecular_graphics     ?
_computing_publication_material   ?
 
_refine_special_details
;
 Refinement of F^2^ against ALL reflections.  The weighted R-factor wR and
 goodness of fit S are based on F^2^, conventional R-factors R are based
 on F, with F set to zero for negative F^2^. The threshold expression of
 F^2^ > 2\s(F^2^) is used only for calculating R-factors(gt) etc. and is
 not relevant to the choice of reflections for refinement.  R-factors based
 on F^2^ are statistically about twice as large as those based on F, and R-
 factors based on ALL data will be even larger.
;
 
_refine_ls_structure_factor_coef  Fsqd
_refine_ls_matrix_type            full
_refine_ls_weighting_scheme       calc
_refine_ls_weighting_details
 'calc w=1/[\s^2^(Fo^2^)+(0.0497P)^2^+1.1811P] where P=(Fo^2^+2Fc^2^)/3'
_atom_sites_solution_primary      direct
_atom_sites_solution_secondary    difmap
_atom_sites_solution_hydrogens    geom
_refine_ls_hydrogen_treatment     mixed
_refine_ls_extinction_method      none
_refine_ls_extinction_coef        ?
_refine_ls_number_reflns          11499
_refine_ls_number_parameters      587
_refine_ls_number_restraints      1027
_refine_ls_R_factor_all           0.0535
_refine_ls_R_factor_gt            0.0331
_refine_ls_wR_factor_ref          0.0890
_refine_ls_wR_factor_gt           0.0810
_refine_ls_goodness_of_fit_ref    1.059
_refine_ls_restrained_S_all       1.021
_refine_ls_shift/su_max           0.032
_refine_ls_shift/su_mean          0.002
 
loop_
 _atom_site_label
 _atom_site_type_symbol
 _atom_site_fract_x
 _atom_site_fract_y
 _atom_site_fract_z
 _atom_site_U_iso_or_equiv
 _atom_site_adp_type
 _atom_site_occupancy
 _atom_site_symmetry_multiplicity
 _atom_site_calc_flag
 _atom_site_refinement_flags
 _atom_site_disorder_assembly
 _atom_site_disorder_group
Ru1 Ru 0.418463(8) 0.570965(10) 0.208301(7) 0.02054(5) Uani 1 1 d U . .
Cl1 Cl 0.37049(3) 0.58327(4) 0.09304(2) 0.03342(11) Uani 1 1 d U . .
Cl2 Cl 0.27352(3) 0.53214(4) 0.20840(3) 0.03397(11) Uani 1 1 d U . .
S1 S 0.45298(3) 0.56667(3) 0.31984(2) 0.02587(10) Uani 1 1 d U . .
P1 P 0.54801(3) 0.63937(3) 0.21884(2) 0.02071(9) Uani 1 1 d U . .
P2 P 0.44387(3) 0.39150(3) 0.19319(2) 0.02091(9) Uani 1 1 d U . .
N1 N 0.38578(9) 0.75402(12) 0.21861(8) 0.0290(3) Uani 1 1 d U . .
C1 C 0.37690(14) 0.50231(17) 0.35373(10) 0.0387(5) Uani 1 1 d U . .
H1A H 0.3264 0.5478 0.3461 0.046 Uiso 1 1 calc R . .
H1B H 0.3603 0.4318 0.3329 0.046 Uiso 1 1 calc R . .
C2 C 0.41475(17) 0.4866(2) 0.42460(12) 0.0539(7) Uani 1 1 d U . .
H2A H 0.4629 0.4382 0.4319 0.081 Uiso 1 1 calc R . .
H2B H 0.3730 0.4551 0.4431 0.081 Uiso 1 1 calc R . .
H2C H 0.4329 0.5563 0.4448 0.081 Uiso 1 1 calc R . .
C3 C 0.53762(11) 0.78248(13) 0.23527(9) 0.0263(4) Uani 1 1 d U . .
C4 C 0.45923(11) 0.82507(14) 0.23150(10) 0.0298(4) Uani 1 1 d U . .
C5 C 0.45040(14) 0.93575(15) 0.23971(13) 0.0437(5) Uani 1 1 d U . .
H5 H 0.3969 0.9650 0.2368 0.052 Uiso 1 1 calc R . .
C6 C 0.51902(15) 1.00219(17) 0.25205(14) 0.0542(7) Uani 1 1 d U . .
H6 H 0.5125 1.0772 0.2576 0.065 Uiso 1 1 calc R . .
C7 C 0.59770(15) 0.96062(17) 0.25651(14) 0.0500(6) Uani 1 1 d U . .
H7 H 0.6450 1.0067 0.2653 0.060 Uiso 1 1 calc R . .
C8 C 0.60649(12) 0.85162(15) 0.24804(11) 0.0364(5) Uani 1 1 d U . .
H8 H 0.6602 0.8231 0.2509 0.044 Uiso 1 1 calc R . .
C9 C 0.34481(13) 0.76944(16) 0.27103(12) 0.0414(5) Uani 1 1 d U . .
H9A H 0.3864 0.7606 0.3125 0.062 Uiso 1 1 calc R . .
H9B H 0.3005 0.7159 0.2667 0.062 Uiso 1 1 calc R . .
H9C H 0.3208 0.8419 0.2681 0.062 Uiso 1 1 calc R . .
C10 C 0.32386(13) 0.78961(17) 0.15812(12) 0.0453(5) Uani 1 1 d U . .
H10A H 0.3045 0.8624 0.1637 0.068 Uiso 1 1 calc R . .
H10B H 0.2762 0.7401 0.1477 0.068 Uiso 1 1 calc R . .
H10C H 0.3504 0.7896 0.1233 0.068 Uiso 1 1 calc R . .
C11 C 0.63092(10) 0.59287(14) 0.28854(9) 0.0256(4) Uani 1 1 d U . .
C12 C 0.64333(12) 0.64016(17) 0.34834(9) 0.0339(4) Uani 1 1 d U . .
H12 H 0.6135 0.7034 0.3528 0.041 Uiso 1 1 calc R . .
C13 C 0.69995(13) 0.5944(2) 0.40203(11) 0.0459(6) Uani 1 1 d U . .
H13 H 0.7076 0.6262 0.4429 0.055 Uiso 1 1 calc R . .
C14 C 0.74468(13) 0.5036(2) 0.39598(12) 0.0475(6) Uani 1 1 d U . .
H14 H 0.7825 0.4726 0.4326 0.057 Uiso 1 1 calc R . .
C15 C 0.73456(12) 0.45780(17) 0.33694(12) 0.0415(5) Uani 1 1 d U . .
H15 H 0.7666 0.3965 0.3327 0.050 Uiso 1 1 calc R . .
C16 C 0.67784(11) 0.50079(14) 0.28359(10) 0.0308(4) Uani 1 1 d U . .
H16 H 0.6705 0.4677 0.2431 0.037 Uiso 1 1 calc R . .
C17 C 0.60410(11) 0.65256(13) 0.15739(9) 0.0254(4) Uani 1 1 d U . .
C18 C 0.55878(13) 0.67840(17) 0.09515(10) 0.0370(4) Uani 1 1 d U . .
H18 H 0.4999 0.6868 0.0851 0.044 Uiso 1 1 calc R . .
C19 C 0.59865(16) 0.6920(2) 0.04763(11) 0.0483(6) Uani 1 1 d U . .
H19 H 0.5671 0.7098 0.0054 0.058 Uiso 1 1 calc R . .
C20 C 0.68370(17) 0.6797(2) 0.06168(12) 0.0515(6) Uani 1 1 d U . .
H20 H 0.7107 0.6867 0.0289 0.062 Uiso 1 1 calc R . .
C21 C 0.72995(14) 0.65712(19) 0.12347(12) 0.0452(5) Uani 1 1 d U . .
H21 H 0.7889 0.6501 0.1333 0.054 Uiso 1 1 calc R . .
C22 C 0.69062(12) 0.64467(16) 0.17119(10) 0.0323(4) Uani 1 1 d U . .
H22 H 0.7230 0.6306 0.2137 0.039 Uiso 1 1 calc R . .
C23 C 0.46187(10) 0.30935(12) 0.26595(8) 0.0225(3) Uani 1 1 d U . .
C24 C 0.53721(11) 0.31786(14) 0.31427(9) 0.0254(4) Uani 1 1 d U . .
H24 H 0.5808 0.3612 0.3075 0.031 Uiso 1 1 calc R . .
C25 C 0.54942(12) 0.26422(16) 0.37183(10) 0.0328(4) Uani 1 1 d U . .
H25 H 0.6011 0.2703 0.4040 0.039 Uiso 1 1 calc R . .
C26 C 0.48561(14) 0.20157(17) 0.38231(10) 0.0389(5) Uani 1 1 d U . .
H26 H 0.4936 0.1649 0.4218 0.047 Uiso 1 1 calc R . .
C27 C 0.41077(13) 0.19254(17) 0.33555(10) 0.0380(5) Uani 1 1 d U . .
H27 H 0.3672 0.1497 0.3429 0.046 Uiso 1 1 calc R . .
C28 C 0.39876(11) 0.24608(15) 0.27758(9) 0.0294(4) Uani 1 1 d U . .
H28 H 0.3469 0.2394 0.2456 0.035 Uiso 1 1 calc R . .
C29 C 0.53382(10) 0.35888(13) 0.16269(8) 0.0232(3) Uani 1 1 d U . .
C30 C 0.53952(12) 0.41454(14) 0.10878(9) 0.0294(4) Uani 1 1 d U . .
H30 H 0.4985 0.4670 0.0900 0.035 Uiso 1 1 calc R . .
C31 C 0.60449(13) 0.39439(17) 0.08203(10) 0.0363(4) Uani 1 1 d U . .
H31 H 0.6075 0.4327 0.0451 0.044 Uiso 1 1 calc R . .
C32 C 0.66461(13) 0.31856(17) 0.10922(10) 0.0372(5) Uani 1 1 d U . .
H32 H 0.7099 0.3062 0.0918 0.045 Uiso 1 1 calc R . .
C33 C 0.65855(12) 0.26087(16) 0.16184(10) 0.0336(4) Uani 1 1 d U . .
H33 H 0.6992 0.2076 0.1799 0.040 Uiso 1 1 calc R . .
C34 C 0.59374(11) 0.27997(15) 0.18860(9) 0.0286(4) Uani 1 1 d U . .
H34 H 0.5900 0.2394 0.2246 0.034 Uiso 1 1 calc R . .
C35 C 0.36360(11) 0.30827(15) 0.13687(9) 0.0273(4) Uani 1 1 d U . .
C36 C 0.28271(12) 0.34371(18) 0.10836(10) 0.0348(4) Uani 1 1 d U . .
H36 H 0.2670 0.4152 0.1153 0.042 Uiso 1 1 calc R . .
C37 C 0.22442(13) 0.2740(2) 0.06938(10) 0.0431(5) Uani 1 1 d U . .
H37 H 0.1690 0.2983 0.0505 0.052 Uiso 1 1 calc R . .
C38 C 0.24609(14) 0.1708(2) 0.05800(10) 0.0445(5) Uani 1 1 d U . .
H38 H 0.2059 0.1242 0.0315 0.053 Uiso 1 1 calc R . .
C39 C 0.32631(15) 0.13528(18) 0.08523(11) 0.0482(6) Uani 1 1 d U . .
H39 H 0.3418 0.0641 0.0774 0.058 Uiso 1 1 calc R . .
C40 C 0.38454(14) 0.20377(16) 0.12422(11) 0.0399(5) Uani 1 1 d U . .
H40 H 0.4399 0.1788 0.1427 0.048 Uiso 1 1 calc R . .
C41 C 0.4165(8) 0.2346(7) 0.5239(6) 0.043(3) Uani 0.347(19) 1 d PGU A 1
H41 H 0.4227 0.3077 0.5133 0.051 Uiso 0.347(19) 1 calc PR A 1
C42 C 0.4832(7) 0.1798(7) 0.5643(6) 0.057(5) Uani 0.347(19) 1 d PGU A 1
H42 H 0.5351 0.2154 0.5814 0.069 Uiso 0.347(19) 1 calc PR A 1
C43 C 0.4741(6) 0.0729(8) 0.5798(8) 0.066(4) Uani 0.347(19) 1 d PGU A 1
H43 H 0.5198 0.0354 0.6075 0.079 Uiso 0.347(19) 1 calc PR A 1
C44 C 0.3983(7) 0.0208(6) 0.5549(10) 0.072(5) Uani 0.347(19) 1 d PGU A 1
H44 H 0.3920 -0.0523 0.5655 0.086 Uiso 0.347(19) 1 calc PR A 1
C45 C 0.3315(6) 0.0756(8) 0.5145(8) 0.063(4) Uani 0.347(19) 1 d PGU A 1
H45 H 0.2796 0.0400 0.4974 0.076 Uiso 0.347(19) 1 calc PR A 1
C46 C 0.3406(7) 0.1825(10) 0.4990(5) 0.049(4) Uani 0.347(19) 1 d PGU A 1
H46 H 0.2950 0.2200 0.4713 0.059 Uiso 0.347(19) 1 calc PR A 1
C47 C 0.54525(19) 0.0924(2) 0.00253(19) 0.0756(10) Uani 1 1 d U . .
H47 H 0.5764 0.1569 0.0043 0.091 Uiso 1 1 calc R . .
C48 C 0.54019(18) 0.0455(2) 0.05809(17) 0.0704(9) Uani 1 1 d U . .
H48 H 0.5683 0.0769 0.0980 0.084 Uiso 1 1 calc R . .
C49 C 0.4942(2) -0.0473(3) 0.05594(17) 0.0746(9) Uani 1 1 d U . .
H49 H 0.4896 -0.0798 0.0942 0.090 Uiso 1 1 calc R . .
C41B C 0.4702(5) 0.1884(6) 0.5586(4) 0.041(2) Uani 0.462(19) 1 d PGU B 2
H41B H 0.5195 0.2309 0.5688 0.050 Uiso 0.462(19) 1 calc PR B 2
C42B C 0.4644(5) 0.1001(9) 0.5962(4) 0.064(3) Uani 0.462(19) 1 d PGU B 2
H42B H 0.5097 0.0822 0.6320 0.077 Uiso 0.462(19) 1 calc PR B 2
C43B C 0.3923(5) 0.0379(7) 0.5812(5) 0.063(2) Uani 0.462(19) 1 d PGU B 2
H43B H 0.3883 -0.0225 0.6069 0.076 Uiso 0.462(19) 1 calc PR B 2
C44B C 0.3260(4) 0.0641(7) 0.5287(4) 0.047(2) Uani 0.462(19) 1 d PGU B 2
H44B H 0.2767 0.0216 0.5185 0.057 Uiso 0.462(19) 1 calc PR B 2
C45B C 0.3318(5) 0.1524(10) 0.4911(4) 0.057(3) Uani 0.462(19) 1 d PGU B 2
H45B H 0.2864 0.1703 0.4552 0.068 Uiso 0.462(19) 1 calc PR B 2
C46B C 0.4039(6) 0.2146(7) 0.5061(5) 0.052(2) Uani 0.462(19) 1 d PGU B 2
H46B H 0.4078 0.2750 0.4804 0.062 Uiso 0.462(19) 1 calc PR B 2
C41C C 0.4193(8) 0.0249(7) 0.5028(9) 0.071(6) Uani 0.168(6) 1 d PGU C 3
H41C H 0.4157 -0.0476 0.4885 0.085 Uiso 0.168(6) 1 calc PR C 3
C42C C 0.4946(6) 0.0651(11) 0.5407(8) 0.076(5) Uani 0.168(6) 1 d PGU C 3
H42C H 0.5426 0.0202 0.5522 0.091 Uiso 0.168(6) 1 calc PR C 3
C43C C 0.4999(9) 0.1712(14) 0.5617(6) 0.057(5) Uani 0.168(6) 1 d PGU C 3
H43C H 0.5514 0.1987 0.5876 0.069 Uiso 0.168(6) 1 calc PR C 3
C44C C 0.4297(12) 0.2369(11) 0.5449(8) 0.054(5) Uani 0.168(6) 1 d PGU C 3
H44C H 0.4333 0.3094 0.5593 0.065 Uiso 0.168(6) 1 calc PR C 3
C45C C 0.3543(9) 0.1967(11) 0.5070(8) 0.064(6) Uani 0.168(6) 1 d PGU C 3
H45C H 0.3064 0.2416 0.4955 0.077 Uiso 0.168(6) 1 calc PR C 3
C46C C 0.3491(6) 0.0906(11) 0.4860(7) 0.057(5) Uani 0.168(6) 1 d PGU C 3
H46C H 0.2976 0.0631 0.4601 0.068 Uiso 0.168(6) 1 calc PR C 3
H1 H 0.5092(15) 0.4952(19) 0.3407(11) 0.050(7) Uiso 1 1 d . . .
 
loop_
 _atom_site_aniso_label
 _atom_site_aniso_U_11
 _atom_site_aniso_U_22
 _atom_site_aniso_U_33
 _atom_site_aniso_U_23
 _atom_site_aniso_U_13
 _atom_site_aniso_U_12
Ru1 0.01436(7) 0.01830(7) 0.02934(9) 0.00361(5) 0.00675(6) 0.00174(5)
Cl1 0.0249(2) 0.0403(2) 0.0317(3) 0.01014(19) 0.00245(18) 0.00211(18)
Cl2 0.01826(19) 0.0323(2) 0.0531(3) -0.0001(2) 0.01279(19) -0.00112(17)
S1 0.0263(2) 0.0236(2) 0.0310(2) -0.00096(17) 0.01342(19) -0.00011(17)
P1 0.01676(19) 0.01777(18) 0.0287(2) 0.00299(16) 0.00810(17) 0.00087(15)
P2 0.01630(19) 0.01890(18) 0.0271(2) 0.00121(17) 0.00540(17) -0.00027(15)
N1 0.0199(7) 0.0201(7) 0.0466(10) 0.0037(6) 0.0087(7) 0.0041(6)
C1 0.0434(12) 0.0359(10) 0.0473(12) 0.0006(9) 0.0301(10) -0.0012(9)
C2 0.0675(17) 0.0559(15) 0.0512(14) 0.0163(12) 0.0379(13) 0.0186(13)
C3 0.0249(8) 0.0195(7) 0.0360(10) -0.0001(7) 0.0114(7) -0.0009(7)
C4 0.0248(9) 0.0217(8) 0.0447(11) 0.0010(8) 0.0129(8) 0.0010(7)
C5 0.0338(11) 0.0238(9) 0.0764(17) -0.0032(10) 0.0202(11) 0.0044(8)
C6 0.0499(13) 0.0205(9) 0.099(2) -0.0102(11) 0.0322(14) -0.0017(9)
C7 0.0417(12) 0.0256(9) 0.0896(19) -0.0133(11) 0.0297(13) -0.0111(9)
C8 0.0286(9) 0.0258(9) 0.0590(14) -0.0069(9) 0.0194(9) -0.0027(8)
C9 0.0338(10) 0.0284(9) 0.0708(15) -0.0021(10) 0.0291(11) 0.0056(8)
C10 0.0331(11) 0.0300(10) 0.0626(15) 0.0086(10) -0.0030(10) 0.0097(8)
C11 0.0162(7) 0.0276(8) 0.0329(10) 0.0060(7) 0.0069(7) -0.0038(6)
C12 0.0254(9) 0.0440(11) 0.0341(11) 0.0030(9) 0.0115(8) -0.0048(8)
C13 0.0326(11) 0.0736(16) 0.0292(11) 0.0094(10) 0.0053(9) -0.0134(11)
C14 0.0253(10) 0.0632(15) 0.0477(14) 0.0275(12) 0.0002(9) -0.0046(10)
C15 0.0222(9) 0.0360(10) 0.0627(15) 0.0195(10) 0.0057(9) 0.0016(8)
C16 0.0204(8) 0.0231(8) 0.0470(12) 0.0058(8) 0.0063(8) -0.0044(7)
C17 0.0260(8) 0.0191(7) 0.0337(10) 0.0006(7) 0.0130(8) -0.0015(7)
C18 0.0347(10) 0.0403(11) 0.0374(11) 0.0070(9) 0.0124(9) -0.0021(9)
C19 0.0599(15) 0.0516(13) 0.0366(12) 0.0090(10) 0.0186(11) -0.0085(11)
C20 0.0625(16) 0.0539(14) 0.0521(15) 0.0026(11) 0.0391(13) -0.0058(12)
C21 0.0377(11) 0.0478(13) 0.0610(15) 0.0044(11) 0.0316(11) -0.0001(10)
C22 0.0279(9) 0.0322(9) 0.0403(11) 0.0013(8) 0.0152(8) -0.0002(8)
C23 0.0220(8) 0.0160(7) 0.0310(9) 0.0015(6) 0.0098(7) 0.0024(6)
C24 0.0216(8) 0.0236(8) 0.0321(10) 0.0017(7) 0.0092(7) -0.0002(7)
C25 0.0303(10) 0.0331(10) 0.0333(10) 0.0044(8) 0.0060(8) 0.0049(8)
C26 0.0455(12) 0.0344(10) 0.0391(12) 0.0136(9) 0.0159(10) 0.0034(9)
C27 0.0378(11) 0.0351(10) 0.0457(12) 0.0066(9) 0.0195(10) -0.0071(9)
C28 0.0216(8) 0.0292(9) 0.0386(11) 0.0024(8) 0.0102(8) -0.0028(7)
C29 0.0204(8) 0.0200(7) 0.0296(9) -0.0048(7) 0.0080(7) -0.0029(6)
C30 0.0305(9) 0.0264(9) 0.0321(10) -0.0004(7) 0.0104(8) 0.0004(7)
C31 0.0434(12) 0.0333(10) 0.0390(11) -0.0010(9) 0.0227(10) -0.0016(9)
C32 0.0335(10) 0.0370(10) 0.0476(12) -0.0098(9) 0.0221(9) -0.0006(9)
C33 0.0276(9) 0.0293(9) 0.0445(12) -0.0046(8) 0.0113(8) 0.0053(8)
C34 0.0262(9) 0.0273(8) 0.0326(10) -0.0011(7) 0.0089(8) 0.0013(7)
C35 0.0244(8) 0.0287(9) 0.0281(9) 0.0004(7) 0.0060(7) -0.0072(7)
C36 0.0235(9) 0.0456(11) 0.0352(11) -0.0030(9) 0.0084(8) -0.0057(8)
C37 0.0236(9) 0.0697(15) 0.0342(11) -0.0043(10) 0.0056(8) -0.0132(10)
C38 0.0426(12) 0.0551(14) 0.0349(12) -0.0053(10) 0.0092(10) -0.0262(11)
C39 0.0563(14) 0.0328(11) 0.0488(14) -0.0064(10) 0.0038(11) -0.0153(10)
C40 0.0376(11) 0.0292(10) 0.0448(13) -0.0040(9) -0.0015(9) -0.0044(8)
C41 0.066(7) 0.054(5) 0.007(5) 0.013(4) 0.010(4) 0.014(5)
C42 0.031(5) 0.072(8) 0.059(8) -0.012(6) -0.003(5) 0.024(5)
C43 0.075(7) 0.028(4) 0.069(8) 0.002(5) -0.022(6) 0.011(4)
C44 0.056(6) 0.046(5) 0.096(10) 0.024(6) -0.008(6) -0.002(4)
C45 0.032(5) 0.063(7) 0.090(9) 0.011(6) 0.010(6) -0.013(5)
C46 0.046(5) 0.051(6) 0.028(5) -0.016(4) -0.029(4) 0.021(5)
C47 0.0524(17) 0.0531(16) 0.105(3) -0.0231(18) -0.0044(17) 0.0023(13)
C48 0.0526(16) 0.0597(17) 0.080(2) -0.0294(16) -0.0124(15) 0.0144(13)
C49 0.0641(19) 0.0655(18) 0.081(2) -0.0109(16) -0.0009(16) 0.0091(15)
C41B 0.033(4) 0.042(4) 0.057(5) -0.010(4) 0.025(4) -0.009(3)
C42B 0.059(4) 0.042(5) 0.063(5) 0.011(4) -0.028(4) -0.005(3)
C43B 0.075(5) 0.060(4) 0.053(5) 0.012(4) 0.016(4) -0.017(4)
C44B 0.043(4) 0.045(4) 0.054(4) 0.008(3) 0.013(3) -0.007(3)
C45B 0.057(5) 0.063(6) 0.047(5) -0.012(5) 0.010(4) -0.013(4)
C46B 0.061(5) 0.064(4) 0.034(5) 0.014(4) 0.017(4) -0.004(4)
C41C 0.060(9) 0.019(6) 0.127(14) 0.027(8) 0.015(9) -0.004(6)
C42C 0.040(7) 0.063(9) 0.125(12) 0.068(9) 0.023(8) 0.007(7)
C43C 0.035(9) 0.086(11) 0.060(9) 0.003(9) 0.027(7) 0.006(9)
C44C 0.064(8) 0.064(8) 0.041(8) -0.006(6) 0.027(7) 0.003(6)
C45C 0.059(11) 0.079(12) 0.051(11) -0.015(10) 0.010(10) 0.021(10)
C46C 0.032(7) 0.065(10) 0.071(10) -0.018(9) 0.011(7) -0.036(7)
 
_geom_special_details
;
 All s.u.'s (except the s.u. in the dihedral angle between two l.s. planes)
 are estimated using the full covariance matrix.  The cell s.u.'s are taken
 into account individually in the estimation of s.u.'s in distances, angles
 and torsion angles; correlations between s.u.'s in cell parameters are only
 used when they are defined by crystal symmetry.  An approximate (isotropic)
 treatment of cell s.u.'s is used for estimating s.u.'s involving l.s. planes.
;
 
loop_
 _geom_bond_atom_site_label_1
 _geom_bond_atom_site_label_2
 _geom_bond_distance
 _geom_bond_site_symmetry_2
 _geom_bond_publ_flag
Ru1 P1 2.2743(4) . ?
Ru1 P2 2.3110(5) . ?
Ru1 S1 2.3397(5) . ?
Ru1 N1 2.3646(15) . ?
Ru1 Cl1 2.4210(5) . ?
Ru1 Cl2 2.4678(5) . ?
S1 C1 1.8243(19) . ?
S1 H1 1.28(2) . ?
P1 C3 1.8320(17) . ?
P1 C11 1.8385(18) . ?
P1 C17 1.8462(18) . ?
P2 C23 1.8405(17) . ?
P2 C29 1.8504(17) . ?
P2 C35 1.8575(18) . ?
N1 C4 1.472(2) . ?
N1 C10 1.497(3) . ?
N1 C9 1.501(3) . ?
C1 C2 1.510(3) . ?
C1 H1A 0.9900 . ?
C1 H1B 0.9900 . ?
C2 H2A 0.9800 . ?
C2 H2B 0.9800 . ?
C2 H2C 0.9800 . ?
C3 C4 1.392(3) . ?
C3 C8 1.399(3) . ?
C4 C5 1.400(3) . ?
C5 C6 1.376(3) . ?
C5 H5 0.9500 . ?
C6 C7 1.389(3) . ?
C6 H6 0.9500 . ?
C7 C8 1.380(3) . ?
C7 H7 0.9500 . ?
C8 H8 0.9500 . ?
C9 H9A 0.9800 . ?
C9 H9B 0.9800 . ?
C9 H9C 0.9800 . ?
C10 H10A 0.9800 . ?
C10 H10B 0.9800 . ?
C10 H10C 0.9800 . ?
C11 C12 1.393(3) . ?
C11 C16 1.408(3) . ?
C12 C13 1.403(3) . ?
C12 H12 0.9500 . ?
C13 C14 1.380(4) . ?
C13 H13 0.9500 . ?
C14 C15 1.375(4) . ?
C14 H14 0.9500 . ?
C15 C16 1.385(3) . ?
C15 H15 0.9500 . ?
C16 H16 0.9500 . ?
C17 C22 1.393(3) . ?
C17 C18 1.394(3) . ?
C18 C19 1.391(3) . ?
C18 H18 0.9500 . ?
C19 C20 1.374(4) . ?
C19 H19 0.9500 . ?
C20 C21 1.381(4) . ?
C20 H20 0.9500 . ?
C21 C22 1.387(3) . ?
C21 H21 0.9500 . ?
C22 H22 0.9500 . ?
C23 C28 1.394(2) . ?
C23 C24 1.400(2) . ?
C24 C25 1.386(3) . ?
C24 H24 0.9500 . ?
C25 C26 1.389(3) . ?
C25 H25 0.9500 . ?
C26 C27 1.378(3) . ?
C26 H26 0.9500 . ?
C27 C28 1.393(3) . ?
C27 H27 0.9500 . ?
C28 H28 0.9500 . ?
C29 C30 1.391(3) . ?
C29 C34 1.401(2) . ?
C30 C31 1.391(3) . ?
C30 H30 0.9500 . ?
C31 C32 1.383(3) . ?
C31 H31 0.9500 . ?
C32 C33 1.382(3) . ?
C32 H32 0.9500 . ?
C33 C34 1.387(3) . ?
C33 H33 0.9500 . ?
C34 H34 0.9500 . ?
C35 C36 1.390(3) . ?
C35 C40 1.392(3) . ?
C36 C37 1.399(3) . ?
C36 H36 0.9500 . ?
C37 C38 1.373(4) . ?
C37 H37 0.9500 . ?
C38 C39 1.376(3) . ?
C38 H38 0.9500 . ?
C39 C40 1.389(3) . ?
C39 H39 0.9500 . ?
C40 H40 0.9500 . ?
C41 C42 1.3900 . ?
C41 C46 1.3900 . ?
C41 H41 0.9500 . ?
C42 C43 1.3900 . ?
C42 H42 0.9500 . ?
C43 C44 1.3900 . ?
C43 H43 0.9500 . ?
C44 C45 1.3900 . ?
C44 H44 0.9500 . ?
C45 C46 1.3900 . ?
C45 H45 0.9500 . ?
C46 H46 0.9500 . ?
C47 C48 1.369(5) . ?
C47 C49 1.380(4) 3_655 ?
C47 H47 0.9500 . ?
C48 C49 1.379(5) . ?
C48 H48 0.9500 . ?
C49 C47 1.380(4) 3_655 ?
C49 H49 0.9500 . ?
C41B C42B 1.3900 . ?
C41B C46B 1.3900 . ?
C41B H41B 0.9500 . ?
C42B C43B 1.3900 . ?
C42B H42B 0.9500 . ?
C43B C44B 1.3900 . ?
C43B H43B 0.9500 . ?
C44B C45B 1.3900 . ?
C44B H44B 0.9500 . ?
C45B C46B 1.3900 . ?
C45B H45B 0.9500 . ?
C46B H46B 0.9500 . ?
C41C C42C 1.3900 . ?
C41C C46C 1.3900 . ?
C41C H41C 0.9500 . ?
C42C C43C 1.3900 . ?
C42C H42C 0.9500 . ?
C43C C44C 1.3900 . ?
C43C H43C 0.9500 . ?
C44C C45C 1.3900 . ?
C44C H44C 0.9500 . ?
C45C C46C 1.3900 . ?
C45C H45C 0.9500 . ?
C46C H46C 0.9500 . ?
 
loop_
 _geom_angle_atom_site_label_1
 _geom_angle_atom_site_label_2
 _geom_angle_atom_site_label_3
 _geom_angle
 _geom_angle_site_symmetry_1
 _geom_angle_site_symmetry_3
 _geom_angle_publ_flag
P1 Ru1 P2 99.648(16) . . ?
P1 Ru1 S1 87.383(17) . . ?
P2 Ru1 S1 97.191(16) . . ?
P1 Ru1 N1 82.48(4) . . ?
P2 Ru1 N1 176.74(4) . . ?
S1 Ru1 N1 85.34(4) . . ?
P1 Ru1 Cl1 96.246(17) . . ?
P2 Ru1 Cl1 86.154(17) . . ?
S1 Ru1 Cl1 174.610(16) . . ?
N1 Ru1 Cl1 91.17(4) . . ?
P1 Ru1 Cl2 167.859(17) . . ?
P2 Ru1 Cl2 91.766(16) . . ?
S1 Ru1 Cl2 87.094(17) . . ?
N1 Ru1 Cl2 86.30(4) . . ?
Cl1 Ru1 Cl2 88.584(17) . . ?
C1 S1 Ru1 115.85(8) . . ?
C1 S1 H1 94.4(11) . . ?
Ru1 S1 H1 109.1(11) . . ?
C3 P1 C11 103.51(8) . . ?
C3 P1 C17 98.70(8) . . ?
C11 P1 C17 102.21(8) . . ?
C3 P1 Ru1 104.06(6) . . ?
C11 P1 Ru1 116.07(6) . . ?
C17 P1 Ru1 128.44(6) . . ?
C23 P2 C29 103.71(8) . . ?
C23 P2 C35 100.06(8) . . ?
C29 P2 C35 98.47(8) . . ?
C23 P2 Ru1 113.83(6) . . ?
C29 P2 Ru1 117.57(5) . . ?
C35 P2 Ru1 120.30(6) . . ?
C4 N1 C10 108.83(15) . . ?
C4 N1 C9 108.13(15) . . ?
C10 N1 C9 106.56(16) . . ?
C4 N1 Ru1 113.14(10) . . ?
C10 N1 Ru1 108.71(12) . . ?
C9 N1 Ru1 111.23(11) . . ?
C2 C1 S1 109.49(17) . . ?
C2 C1 H1A 109.8 . . ?
S1 C1 H1A 109.8 . . ?
C2 C1 H1B 109.8 . . ?
S1 C1 H1B 109.8 . . ?
H1A C1 H1B 108.2 . . ?
C1 C2 H2A 109.5 . . ?
C1 C2 H2B 109.5 . . ?
H2A C2 H2B 109.5 . . ?
C1 C2 H2C 109.5 . . ?
H2A C2 H2C 109.5 . . ?
H2B C2 H2C 109.5 . . ?
C4 C3 C8 118.97(16) . . ?
C4 C3 P1 119.77(13) . . ?
C8 C3 P1 121.16(14) . . ?
C3 C4 C5 119.79(17) . . ?
C3 C4 N1 120.11(15) . . ?
C5 C4 N1 120.10(16) . . ?
C6 C5 C4 120.17(19) . . ?
C6 C5 H5 119.9 . . ?
C4 C5 H5 119.9 . . ?
C5 C6 C7 120.63(19) . . ?
C5 C6 H6 119.7 . . ?
C7 C6 H6 119.7 . . ?
C8 C7 C6 119.3(2) . . ?
C8 C7 H7 120.3 . . ?
C6 C7 H7 120.3 . . ?
C7 C8 C3 121.13(19) . . ?
C7 C8 H8 119.4 . . ?
C3 C8 H8 119.4 . . ?
N1 C9 H9A 109.5 . . ?
N1 C9 H9B 109.5 . . ?
H9A C9 H9B 109.5 . . ?
N1 C9 H9C 109.5 . . ?
H9A C9 H9C 109.5 . . ?
H9B C9 H9C 109.5 . . ?
N1 C10 H10A 109.5 . . ?
N1 C10 H10B 109.5 . . ?
H10A C10 H10B 109.5 . . ?
N1 C10 H10C 109.5 . . ?
H10A C10 H10C 109.5 . . ?
H10B C10 H10C 109.5 . . ?
C12 C11 C16 118.39(18) . . ?
C12 C11 P1 121.47(14) . . ?
C16 C11 P1 119.83(15) . . ?
C11 C12 C13 120.0(2) . . ?
C11 C12 H12 120.0 . . ?
C13 C12 H12 120.0 . . ?
C14 C13 C12 120.5(2) . . ?
C14 C13 H13 119.8 . . ?
C12 C13 H13 119.8 . . ?
C15 C14 C13 120.1(2) . . ?
C15 C14 H14 120.0 . . ?
C13 C14 H14 120.0 . . ?
C14 C15 C16 120.2(2) . . ?
C14 C15 H15 119.9 . . ?
C16 C15 H15 119.9 . . ?
C15 C16 C11 120.8(2) . . ?
C15 C16 H16 119.6 . . ?
C11 C16 H16 119.6 . . ?
C22 C17 C18 118.18(17) . . ?
C22 C17 P1 122.91(14) . . ?
C18 C17 P1 118.78(14) . . ?
C19 C18 C17 120.8(2) . . ?
C19 C18 H18 119.6 . . ?
C17 C18 H18 119.6 . . ?
C20 C19 C18 120.1(2) . . ?
C20 C19 H19 120.0 . . ?
C18 C19 H19 120.0 . . ?
C19 C20 C21 119.9(2) . . ?
C19 C20 H20 120.0 . . ?
C21 C20 H20 120.0 . . ?
C20 C21 C22 120.2(2) . . ?
C20 C21 H21 119.9 . . ?
C22 C21 H21 119.9 . . ?
C21 C22 C17 120.7(2) . . ?
C21 C22 H22 119.7 . . ?
C17 C22 H22 119.7 . . ?
C28 C23 C24 118.06(16) . . ?
C28 C23 P2 121.45(14) . . ?
C24 C23 P2 120.16(13) . . ?
C25 C24 C23 121.25(17) . . ?
C25 C24 H24 119.4 . . ?
C23 C24 H24 119.4 . . ?
C24 C25 C26 119.65(18) . . ?
C24 C25 H25 120.2 . . ?
C26 C25 H25 120.2 . . ?
C27 C26 C25 120.08(19) . . ?
C27 C26 H26 120.0 . . ?
C25 C26 H26 120.0 . . ?
C26 C27 C28 120.19(18) . . ?
C26 C27 H27 119.9 . . ?
C28 C27 H27 119.9 . . ?
C27 C28 C23 120.77(18) . . ?
C27 C28 H28 119.6 . . ?
C23 C28 H28 119.6 . . ?
C30 C29 C34 118.58(16) . . ?
C30 C29 P2 116.80(13) . . ?
C34 C29 P2 124.57(14) . . ?
C29 C30 C31 120.82(18) . . ?
C29 C30 H30 119.6 . . ?
C31 C30 H30 119.6 . . ?
C32 C31 C30 119.98(19) . . ?
C32 C31 H31 120.0 . . ?
C30 C31 H31 120.0 . . ?
C33 C32 C31 119.75(18) . . ?
C33 C32 H32 120.1 . . ?
C31 C32 H32 120.1 . . ?
C32 C33 C34 120.64(18) . . ?
C32 C33 H33 119.7 . . ?
C34 C33 H33 119.7 . . ?
C33 C34 C29 120.17(18) . . ?
C33 C34 H34 119.9 . . ?
C29 C34 H34 119.9 . . ?
C36 C35 C40 118.24(17) . . ?
C36 C35 P2 123.31(15) . . ?
C40 C35 P2 118.41(14) . . ?
C35 C36 C37 119.9(2) . . ?
C35 C36 H36 120.1 . . ?
C37 C36 H36 120.1 . . ?
C38 C37 C36 121.0(2) . . ?
C38 C37 H37 119.5 . . ?
C36 C37 H37 119.5 . . ?
C37 C38 C39 119.68(19) . . ?
C37 C38 H38 120.2 . . ?
C39 C38 H38 120.2 . . ?
C38 C39 C40 119.8(2) . . ?
C38 C39 H39 120.1 . . ?
C40 C39 H39 120.1 . . ?
C39 C40 C35 121.4(2) . . ?
C39 C40 H40 119.3 . . ?
C35 C40 H40 119.3 . . ?
C42 C41 C46 120.0 . . ?
C42 C41 H41 120.0 . . ?
C46 C41 H41 120.0 . . ?
C41 C42 C43 120.0 . . ?
C41 C42 H42 120.0 . . ?
C43 C42 H42 120.0 . . ?
C44 C43 C42 120.0 . . ?
C44 C43 H43 120.0 . . ?
C42 C43 H43 120.0 . . ?
C45 C44 C43 120.0 . . ?
C45 C44 H44 120.0 . . ?
C43 C44 H44 120.0 . . ?
C44 C45 C46 120.0 . . ?
C44 C45 H45 120.0 . . ?
C46 C45 H45 120.0 . . ?
C45 C46 C41 120.0 . . ?
C45 C46 H46 120.0 . . ?
C41 C46 H46 120.0 . . ?
C48 C47 C49 121.0(3) . 3_655 ?
C48 C47 H47 119.5 . . ?
C49 C47 H47 119.5 3_655 . ?
C47 C48 C49 119.9(3) . . ?
C47 C48 H48 120.1 . . ?
C49 C48 H48 120.1 . . ?
C48 C49 C47 119.2(4) . 3_655 ?
C48 C49 H49 120.4 . . ?
C47 C49 H49 120.4 3_655 . ?
C42B C41B C46B 120.0 . . ?
C42B C41B H41B 120.0 . . ?
C46B C41B H41B 120.0 . . ?
C43B C42B C41B 120.0 . . ?
C43B C42B H42B 120.0 . . ?
C41B C42B H42B 120.0 . . ?
C42B C43B C44B 120.0 . . ?
C42B C43B H43B 120.0 . . ?
C44B C43B H43B 120.0 . . ?
C45B C44B C43B 120.0 . . ?
C45B C44B H44B 120.0 . . ?
C43B C44B H44B 120.0 . . ?
C44B C45B C46B 120.0 . . ?
C44B C45B H45B 120.0 . . ?
C46B C45B H45B 120.0 . . ?
C45B C46B C41B 120.0 . . ?
C45B C46B H46B 120.0 . . ?
C41B C46B H46B 120.0 . . ?
C42C C41C C46C 120.0 . . ?
C42C C41C H41C 120.0 . . ?
C46C C41C H41C 120.0 . . ?
C41C C42C C43C 120.0 . . ?
C41C C42C H42C 120.0 . . ?
C43C C42C H42C 120.0 . . ?
C44C C43C C42C 120.0 . . ?
C44C C43C H43C 120.0 . . ?
C42C C43C H43C 120.0 . . ?
C43C C44C C45C 120.0 . . ?
C43C C44C H44C 120.0 . . ?
C45C C44C H44C 120.0 . . ?
C46C C45C C44C 120.0 . . ?
C46C C45C H45C 120.0 . . ?
C44C C45C H45C 120.0 . . ?
C45C C46C C41C 120.0 . . ?
C45C C46C H46C 120.0 . . ?
C41C C46C H46C 120.0 . . ?
 
loop_
 _geom_torsion_atom_site_label_1
 _geom_torsion_atom_site_label_2
 _geom_torsion_atom_site_label_3
 _geom_torsion_atom_site_label_4
 _geom_torsion
 _geom_torsion_site_symmetry_1
 _geom_torsion_site_symmetry_2
 _geom_torsion_site_symmetry_3
 _geom_torsion_site_symmetry_4
 _geom_torsion_publ_flag
P1 Ru1 S1 C1 -173.60(8) . . . . ?
P2 Ru1 S1 C1 -74.20(8) . . . . ?
N1 Ru1 S1 C1 103.74(9) . . . . ?
Cl1 Ru1 S1 C1 53.9(2) . . . . ?
Cl2 Ru1 S1 C1 17.22(8) . . . . ?
P2 Ru1 P1 C3 -177.27(6) . . . . ?
S1 Ru1 P1 C3 -80.41(6) . . . . ?
N1 Ru1 P1 C3 5.23(7) . . . . ?
Cl1 Ru1 P1 C3 95.59(6) . . . . ?
Cl2 Ru1 P1 C3 -17.40(11) . . . . ?
P2 Ru1 P1 C11 -64.27(7) . . . . ?
S1 Ru1 P1 C11 32.58(7) . . . . ?
N1 Ru1 P1 C11 118.22(8) . . . . ?
Cl1 Ru1 P1 C11 -151.42(7) . . . . ?
Cl2 Ru1 P1 C11 95.59(11) . . . . ?
P2 Ru1 P1 C17 69.28(7) . . . . ?
S1 Ru1 P1 C17 166.14(7) . . . . ?
N1 Ru1 P1 C17 -108.22(8) . . . . ?
Cl1 Ru1 P1 C17 -17.86(7) . . . . ?
Cl2 Ru1 P1 C17 -130.85(10) . . . . ?
P1 Ru1 P2 C23 98.45(6) . . . . ?
S1 Ru1 P2 C23 9.90(6) . . . . ?
N1 Ru1 P2 C23 -131.0(7) . . . . ?
Cl1 Ru1 P2 C23 -165.86(6) . . . . ?
Cl2 Ru1 P2 C23 -77.40(6) . . . . ?
P1 Ru1 P2 C29 -23.07(7) . . . . ?
S1 Ru1 P2 C29 -111.63(7) . . . . ?
N1 Ru1 P2 C29 107.5(7) . . . . ?
Cl1 Ru1 P2 C29 72.62(7) . . . . ?
Cl2 Ru1 P2 C29 161.08(7) . . . . ?
P1 Ru1 P2 C35 -142.92(7) . . . . ?
S1 Ru1 P2 C35 128.53(7) . . . . ?
N1 Ru1 P2 C35 -12.3(7) . . . . ?
Cl1 Ru1 P2 C35 -47.22(7) . . . . ?
Cl2 Ru1 P2 C35 41.24(7) . . . . ?
P1 Ru1 N1 C4 -4.32(12) . . . . ?
P2 Ru1 N1 C4 -135.3(7) . . . . ?
S1 Ru1 N1 C4 83.64(12) . . . . ?
Cl1 Ru1 N1 C4 -100.47(12) . . . . ?
Cl2 Ru1 N1 C4 171.02(13) . . . . ?
P1 Ru1 N1 C10 116.70(13) . . . . ?
P2 Ru1 N1 C10 -14.2(8) . . . . ?
S1 Ru1 N1 C10 -155.33(13) . . . . ?
Cl1 Ru1 N1 C10 20.55(13) . . . . ?
Cl2 Ru1 N1 C10 -67.95(13) . . . . ?
P1 Ru1 N1 C9 -126.27(13) . . . . ?
P2 Ru1 N1 C9 102.8(7) . . . . ?
S1 Ru1 N1 C9 -38.30(12) . . . . ?
Cl1 Ru1 N1 C9 137.59(12) . . . . ?
Cl2 Ru1 N1 C9 49.08(12) . . . . ?
Ru1 S1 C1 C2 169.13(13) . . . . ?
C11 P1 C3 C4 -128.78(16) . . . . ?
C17 P1 C3 C4 126.33(16) . . . . ?
Ru1 P1 C3 C4 -7.04(17) . . . . ?
C11 P1 C3 C8 54.93(18) . . . . ?
C17 P1 C3 C8 -49.96(18) . . . . ?
Ru1 P1 C3 C8 176.67(16) . . . . ?
C8 C3 C4 C5 0.8(3) . . . . ?
P1 C3 C4 C5 -175.60(17) . . . . ?
C8 C3 C4 N1 -179.53(18) . . . . ?
P1 C3 C4 N1 4.1(3) . . . . ?
C10 N1 C4 C3 -119.8(2) . . . . ?
C9 N1 C4 C3 124.82(19) . . . . ?
Ru1 N1 C4 C3 1.2(2) . . . . ?
C10 N1 C4 C5 59.9(3) . . . . ?
C9 N1 C4 C5 -55.5(2) . . . . ?
Ru1 N1 C4 C5 -179.14(17) . . . . ?
C3 C4 C5 C6 -0.6(4) . . . . ?
N1 C4 C5 C6 179.7(2) . . . . ?
C4 C5 C6 C7 0.0(4) . . . . ?
C5 C6 C7 C8 0.4(4) . . . . ?
C6 C7 C8 C3 -0.2(4) . . . . ?
C4 C3 C8 C7 -0.4(3) . . . . ?
P1 C3 C8 C7 175.94(19) . . . . ?
C3 P1 C11 C12 30.08(17) . . . . ?
C17 P1 C11 C12 132.28(15) . . . . ?
Ru1 P1 C11 C12 -83.23(15) . . . . ?
C3 P1 C11 C16 -156.43(14) . . . . ?
C17 P1 C11 C16 -54.23(15) . . . . ?
Ru1 P1 C11 C16 90.26(14) . . . . ?
C16 C11 C12 C13 -1.6(3) . . . . ?
P1 C11 C12 C13 172.02(15) . . . . ?
C11 C12 C13 C14 1.1(3) . . . . ?
C12 C13 C14 C15 0.6(3) . . . . ?
C13 C14 C15 C16 -1.8(3) . . . . ?
C14 C15 C16 C11 1.3(3) . . . . ?
C12 C11 C16 C15 0.4(3) . . . . ?
P1 C11 C16 C15 -173.26(14) . . . . ?
C3 P1 C17 C22 96.45(16) . . . . ?
C11 P1 C17 C22 -9.51(17) . . . . ?
Ru1 P1 C17 C22 -147.75(13) . . . . ?
C3 P1 C17 C18 -79.30(16) . . . . ?
C11 P1 C17 C18 174.74(15) . . . . ?
Ru1 P1 C17 C18 36.50(18) . . . . ?
C22 C17 C18 C19 2.3(3) . . . . ?
P1 C17 C18 C19 178.28(17) . . . . ?
C17 C18 C19 C20 0.2(4) . . . . ?
C18 C19 C20 C21 -2.1(4) . . . . ?
C19 C20 C21 C22 1.3(4) . . . . ?
C20 C21 C22 C17 1.3(3) . . . . ?
C18 C17 C22 C21 -3.1(3) . . . . ?
P1 C17 C22 C21 -178.82(16) . . . . ?
C29 P2 C23 C28 -131.54(15) . . . . ?
C35 P2 C23 C28 -30.17(16) . . . . ?
Ru1 P2 C23 C28 99.51(14) . . . . ?
C29 P2 C23 C24 55.19(15) . . . . ?
C35 P2 C23 C24 156.57(14) . . . . ?
Ru1 P2 C23 C24 -73.75(14) . . . . ?
C28 C23 C24 C25 0.7(3) . . . . ?
P2 C23 C24 C25 174.17(14) . . . . ?
C23 C24 C25 C26 -0.7(3) . . . . ?
C24 C25 C26 C27 0.3(3) . . . . ?
C25 C26 C27 C28 0.0(3) . . . . ?
C26 C27 C28 C23 0.0(3) . . . . ?
C24 C23 C28 C27 -0.4(3) . . . . ?
P2 C23 C28 C27 -173.75(15) . . . . ?
C23 P2 C29 C30 -176.61(13) . . . . ?
C35 P2 C29 C30 80.80(15) . . . . ?
Ru1 P2 C29 C30 -49.99(15) . . . . ?
C23 P2 C29 C34 5.96(17) . . . . ?
C35 P2 C29 C34 -96.64(16) . . . . ?
Ru1 P2 C29 C34 132.58(14) . . . . ?
C34 C29 C30 C31 -1.6(3) . . . . ?
P2 C29 C30 C31 -179.22(15) . . . . ?
C29 C30 C31 C32 -0.3(3) . . . . ?
C30 C31 C32 C33 1.8(3) . . . . ?
C31 C32 C33 C34 -1.5(3) . . . . ?
C32 C33 C34 C29 -0.5(3) . . . . ?
C30 C29 C34 C33 2.0(3) . . . . ?
P2 C29 C34 C33 179.39(14) . . . . ?
C23 P2 C35 C36 116.61(17) . . . . ?
C29 P2 C35 C36 -137.75(17) . . . . ?
Ru1 P2 C35 C36 -8.76(19) . . . . ?
C23 P2 C35 C40 -61.11(17) . . . . ?
C29 P2 C35 C40 44.53(17) . . . . ?
Ru1 P2 C35 C40 173.51(14) . . . . ?
C40 C35 C36 C37 1.5(3) . . . . ?
P2 C35 C36 C37 -176.25(15) . . . . ?
C35 C36 C37 C38 -0.9(3) . . . . ?
C36 C37 C38 C39 -0.1(3) . . . . ?
C37 C38 C39 C40 0.3(4) . . . . ?
C38 C39 C40 C35 0.3(4) . . . . ?
C36 C35 C40 C39 -1.2(3) . . . . ?
P2 C35 C40 C39 176.61(18) . . . . ?
C46 C41 C42 C43 0.0 . . . . ?
C41 C42 C43 C44 0.0 . . . . ?
C42 C43 C44 C45 0.0 . . . . ?
C43 C44 C45 C46 0.0 . . . . ?
C44 C45 C46 C41 0.0 . . . . ?
C42 C41 C46 C45 0.0 . . . . ?
C49 C47 C48 C49 -0.9(5) 3_655 . . . ?
C47 C48 C49 C47 0.9(5) . . . 3_655 ?
C46B C41B C42B C43B 0.0 . . . . ?
C41B C42B C43B C44B 0.0 . . . . ?
C42B C43B C44B C45B 0.0 . . . . ?
C43B C44B C45B C46B 0.0 . . . . ?
C44B C45B C46B C41B 0.0 . . . . ?
C42B C41B C46B C45B 0.0 . . . . ?
C46C C41C C42C C43C 0.0 . . . . ?
C41C C42C C43C C44C 0.0 . . . . ?
C42C C43C C44C C45C 0.0 . . . . ?
C43C C44C C45C C46C 0.0 . . . . ?
C44C C45C C46C C41C 0.0 . . . . ?
C42C C41C C46C C45C 0.0 . . . . ?
 
_diffrn_measured_fraction_theta_max    0.900
_diffrn_reflns_theta_full              25.00
_diffrn_measured_fraction_theta_full   0.992
_refine_diff_density_max    0.729
_refine_diff_density_min   -0.662
_refine_diff_density_rms    0.073


 
